# Supplementary material for: 5F-Cumyl-PINACA in ‘e-liquids’ for electronic cigarettes: comprehensive characterization of a new type of synthetic cannabinoid in a trendy product including investigations on the in vitro and in vivo phase I metabolism of 5F-Cumyl-PINACA and its non-fluorinated analog Cumyl-PINACA
Source: Springer Nature journal article supplement (doi:10.1007/s11419-018-0451-8), 2018-11-13

**5F-Cumyl-PINACA in ‘e-liquids’ for electronic cigarettes: comprehensive characterization of a new type of synthetic cannabinoid in a trendy product including investigations on the in vitro and in vivo phase I metabolism of 5F-Cumyl-PINACA and its non-fluorinated analog Cumyl-PINACA**

Verena Angerer<sup>1,2,†</sup>, Florian Franz<sup>1,2,3,†</sup>, Bjoern Moosmann<sup>4</sup>, Philippe Bisel<sup>5</sup>, Volker Auwärter<sup>1,2,\*</sup>

<sup>1</sup>Institute of Forensic Medicine, Forensic Toxicology, Medical Center – University of Freiburg, Albertstr. 9, 79104 Freiburg, Germany

<sup>2</sup> Faculty of Medicine, University of Freiburg, Breisacher Str. 153, 79110 Freiburg, Germany

<sup>3</sup>Hermann Staudinger Graduate School, University of Freiburg, Hebelstr. 27, 79104 Freiburg, Germany

<sup>4</sup>Institute of Forensic Medicine, Forensic Toxicology, Kantonsspital St.Gallen, Rorschacher Str. 95, 9007 St.Gallen, Switzerland

<sup>5</sup>Institute for Pharmaceutical Sciences, University of Freiburg, Albertstr. 25, 79104 Freiburg, Germany

\* Corresponding author:

V. Auwärter

tel.: +49 761 203 6862

fax: +49 761 203 6826

e-mail: volker.auwaerter@uniklinik-freiburg.de

---

<sup>†</sup>V. Angerer and F. Franz contributed equally to this work.

---

**Fig. S1** Enhanced Product Ion (EPI) spectra of Cumyl-PINACA metabolites detected in pooled human liver microsome (pHLM) assay samples and authentic urine samples (recorded from urine sample 6 after treatment with glucuronidase) in comparison to the EPI spectrum of the parent compound 'Cumyl-PINACA'. Proposed structural formulae and fragmentation is shown for each compound along with their molecular formulae, monoisotopic and single-protonated masses. The EPI scans were recorded with a declustering potential (DP) of 40 V, an entrance potential (EP) of 8 V and a collision energy (CE) of 35 V with a collision energy spread (CES) of  $\pm 15$  V. The position of the dihydrodiol function at the indazole ring for A06 is exemplary and was not confirmed

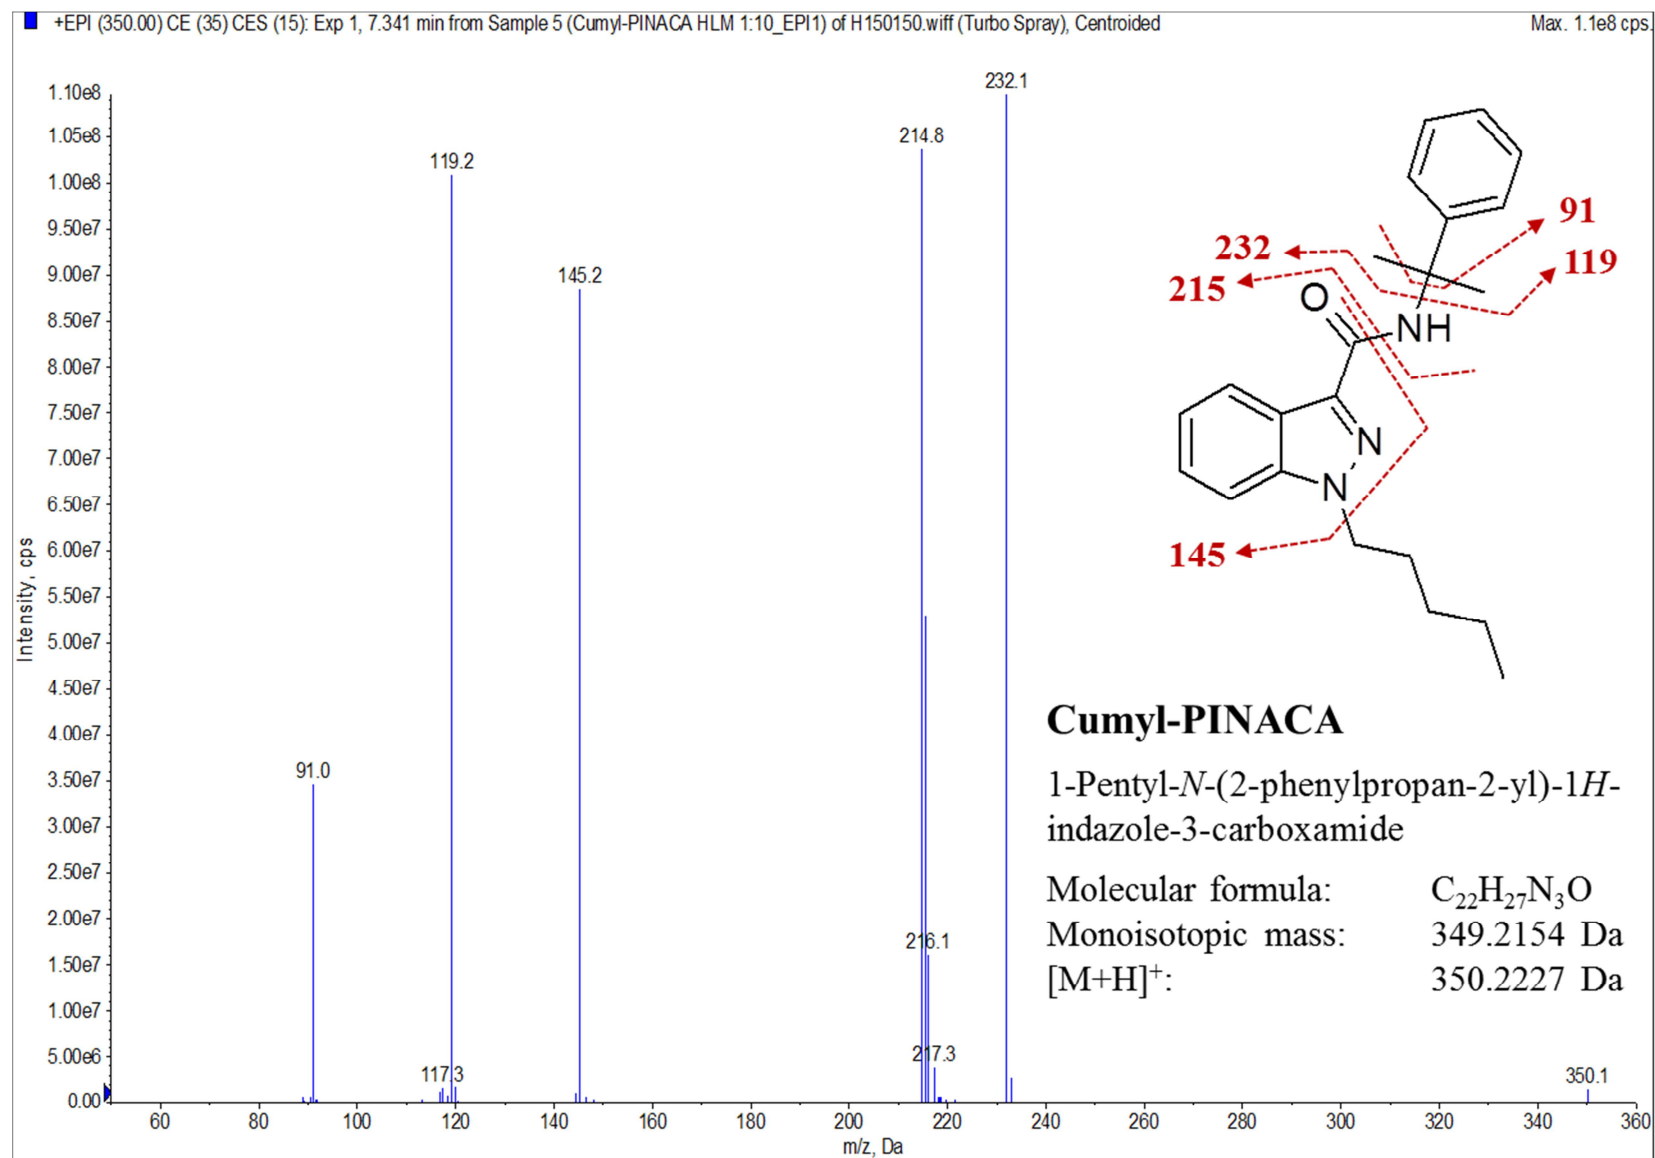

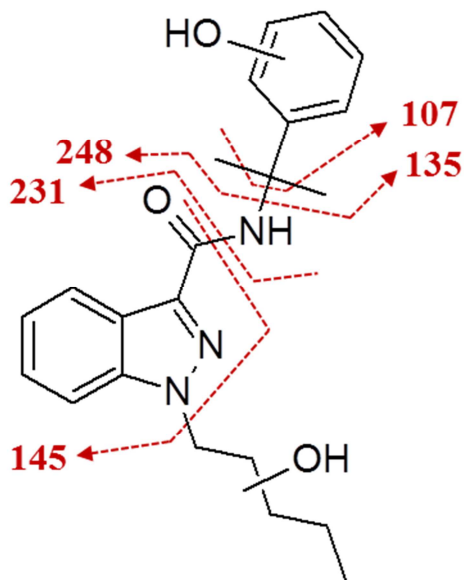

### A01 (RT 3.3 min)

Molecular formula:  $C_{22}H_{27}N_3O_3$   
 Monoisotopic mass: 381.2052 Da  
 $[M+H]^+$ : 382.2125 Da

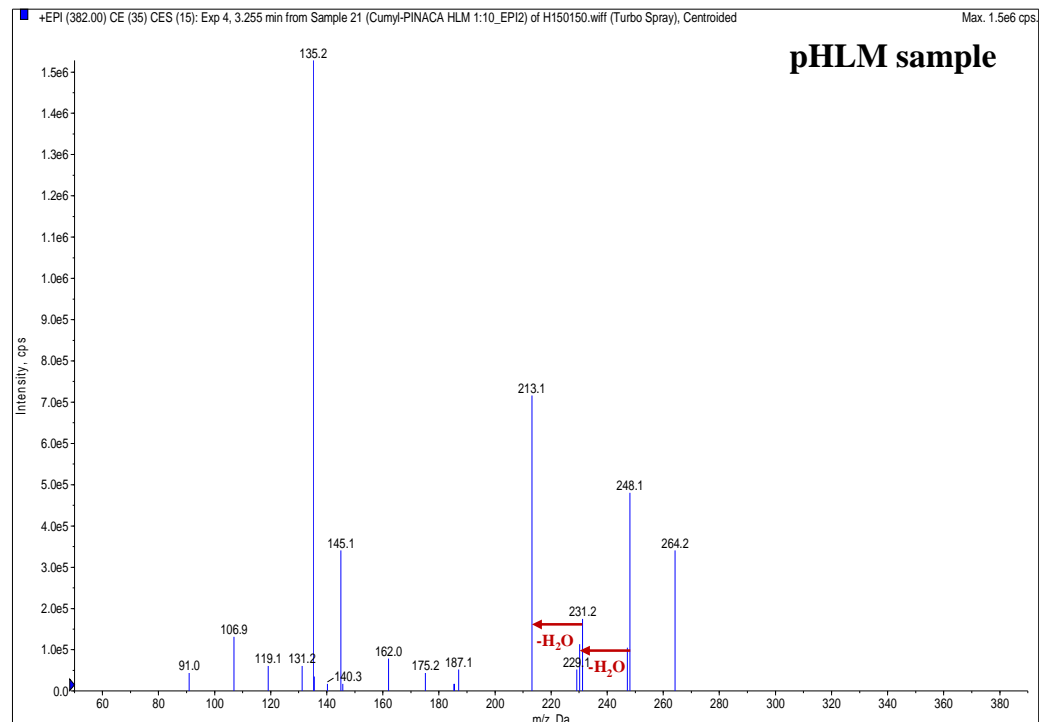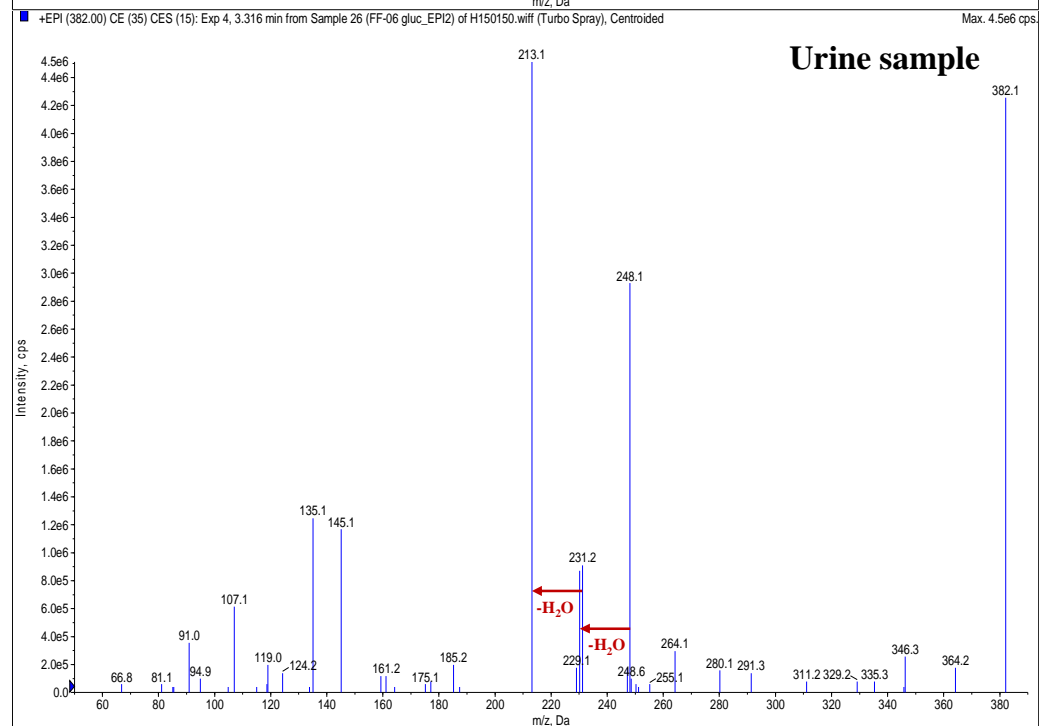

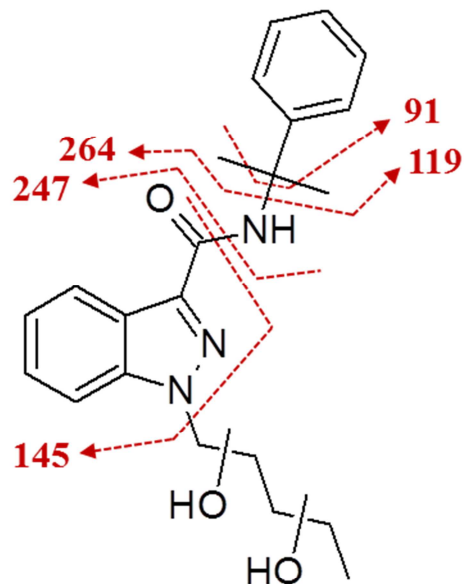

**A02 (RT 3.4 min)**

Molecular formula:  $C_{22}H_{27}N_3O_3$   
 Monoisotopic mass: 381.2052 Da  
 $[M+H]^+$ : 382.2125 Da

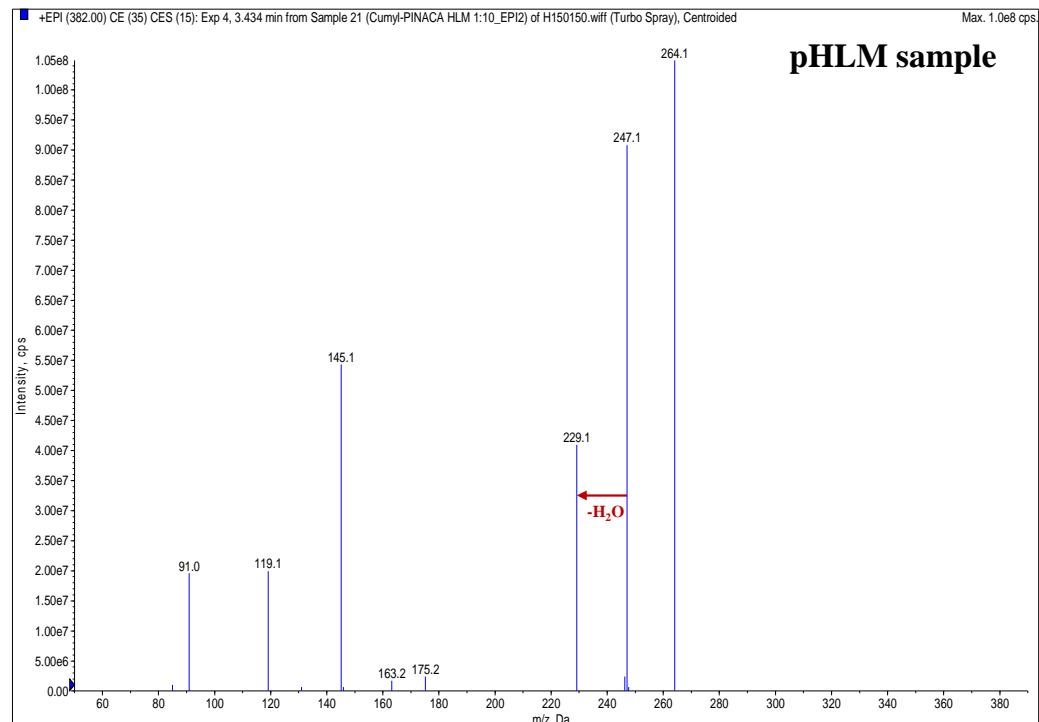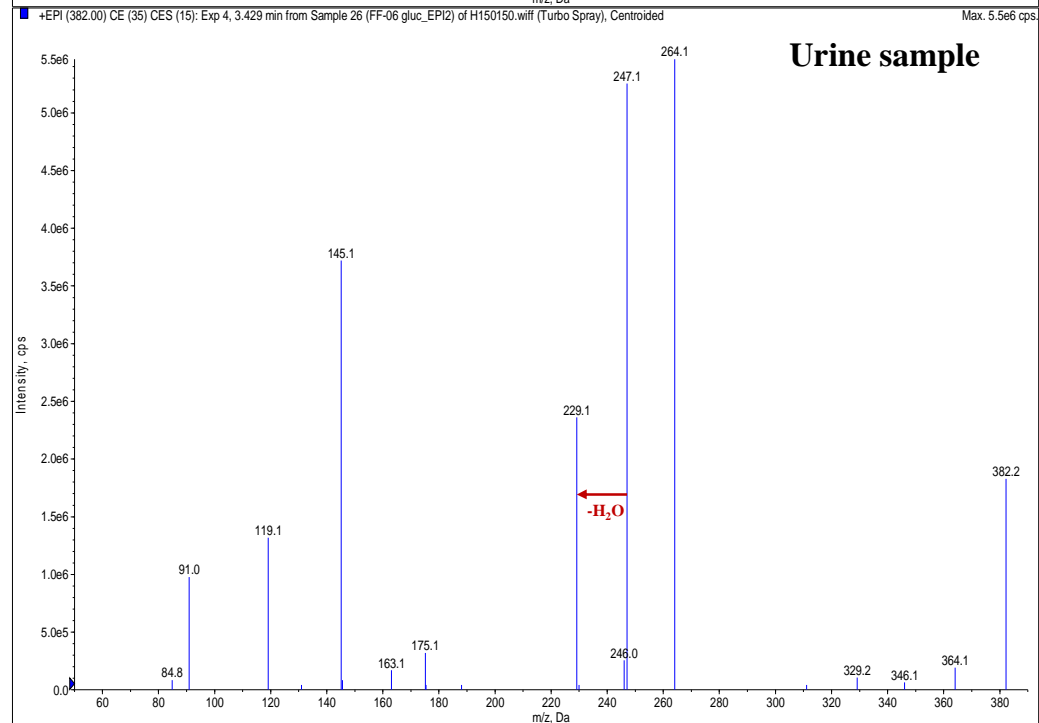

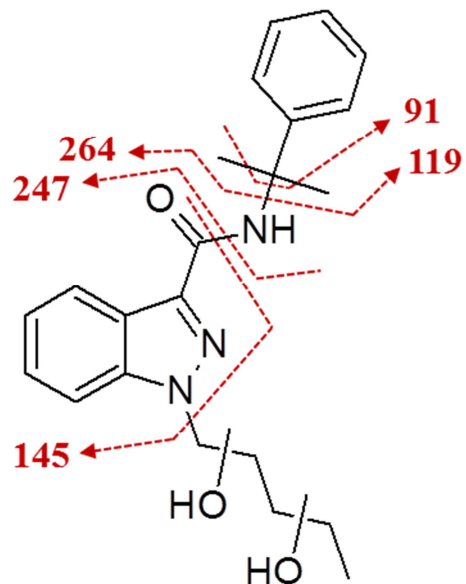

**A03 (RT 3.5 min)**

Molecular formula:  $C_{22}H_{27}N_3O_3$   
 Monoisotopic mass: 381.2052 Da  
 $[M+H]^+$ : 382.2125 Da

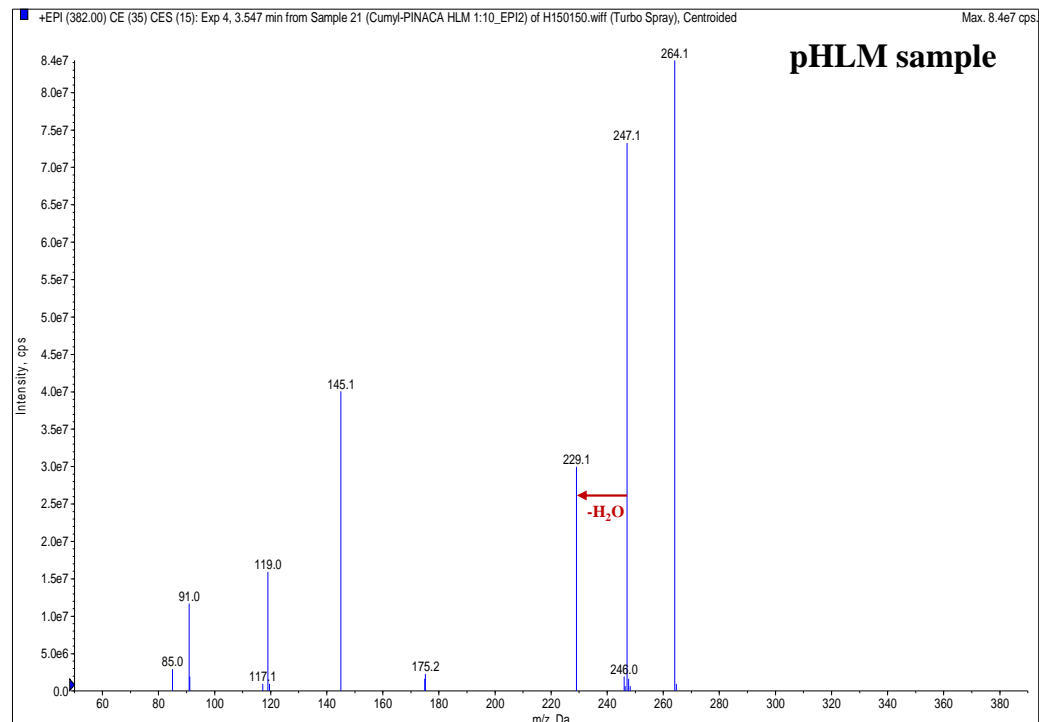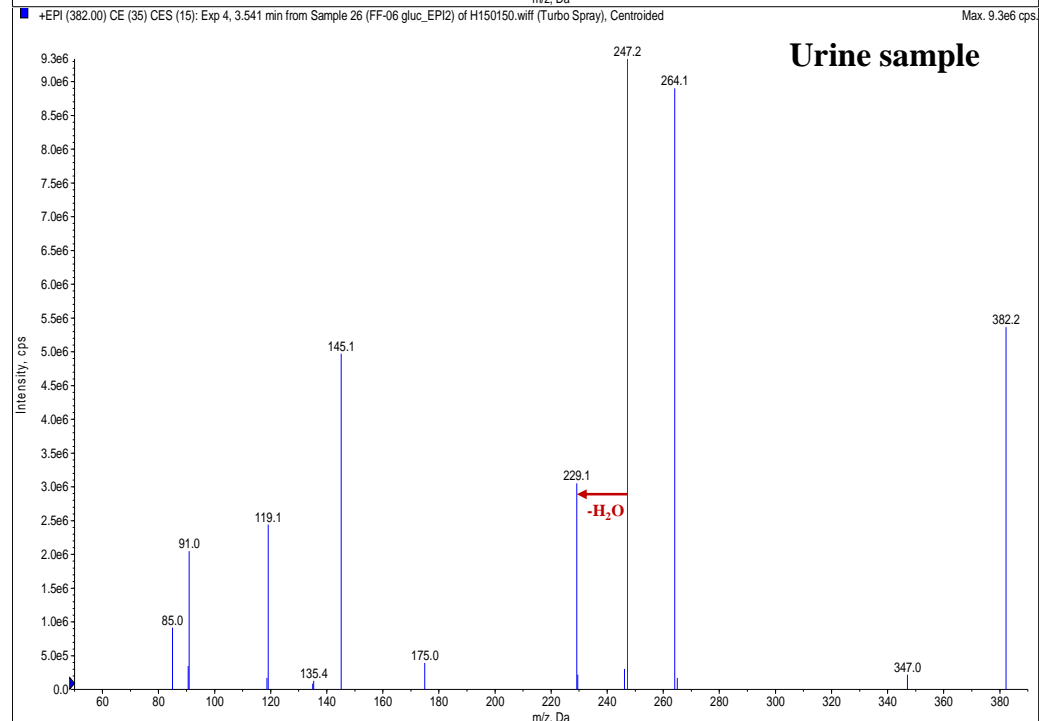

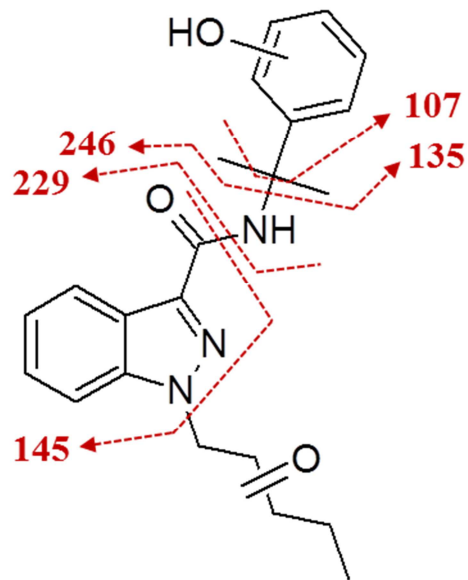

**A04 (RT 3.7 min)**

Molecular formula:  $C_{22}H_{25}N_3O_3$   
 Monoisotopic mass: 379.1896 Da  
 $[M+H]^+$ : 380.1969 Da

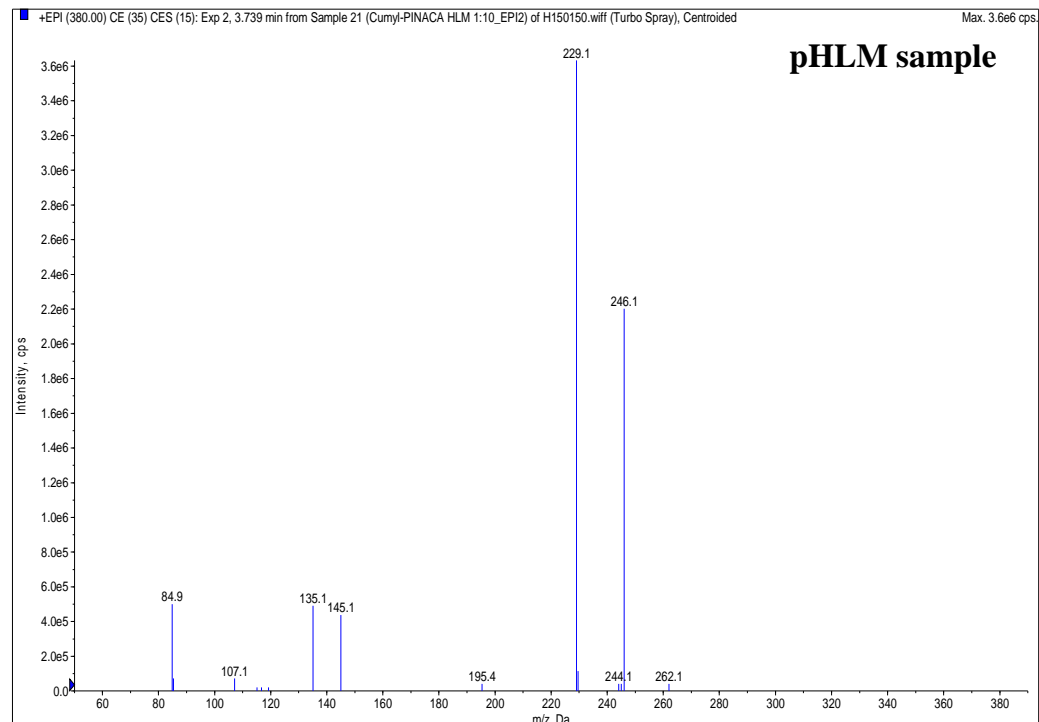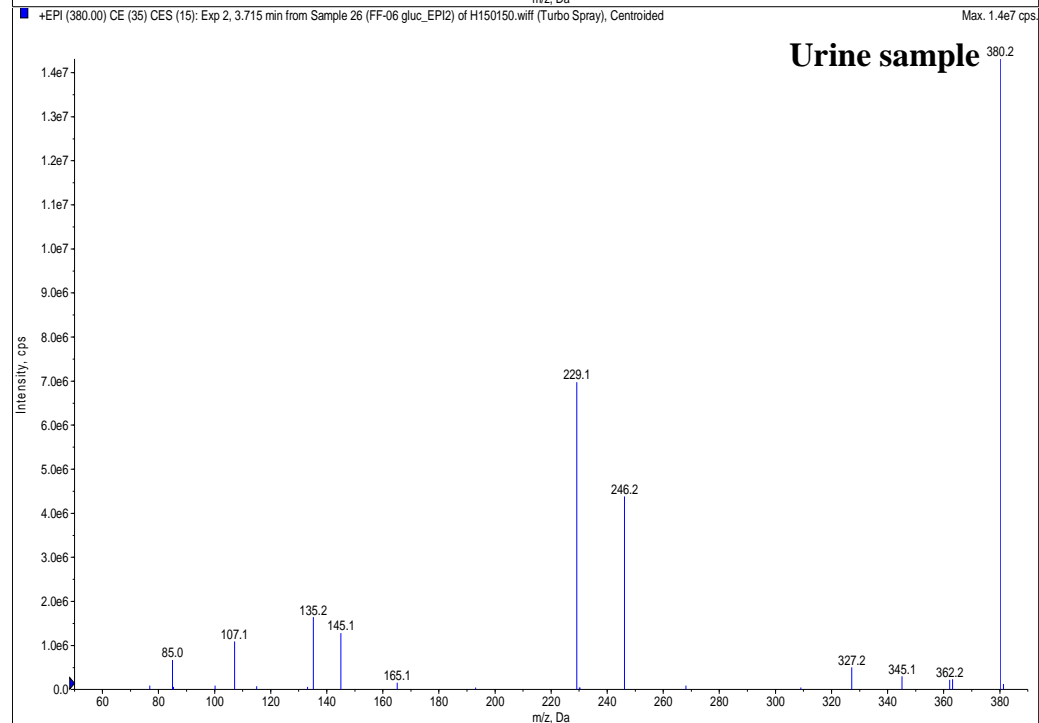

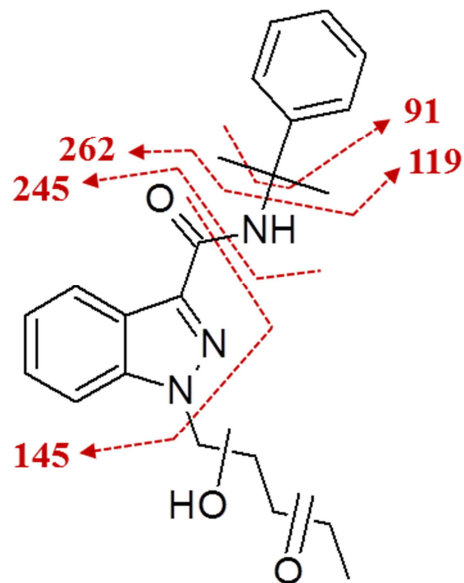

**A05 (RT 4.2 min)**

Molecular formula:  $C_{22}H_{25}N_3O_3$   
 Monoisotopic mass: 379.1896 Da  
 $[M+H]^+$ : 380.1969 Da

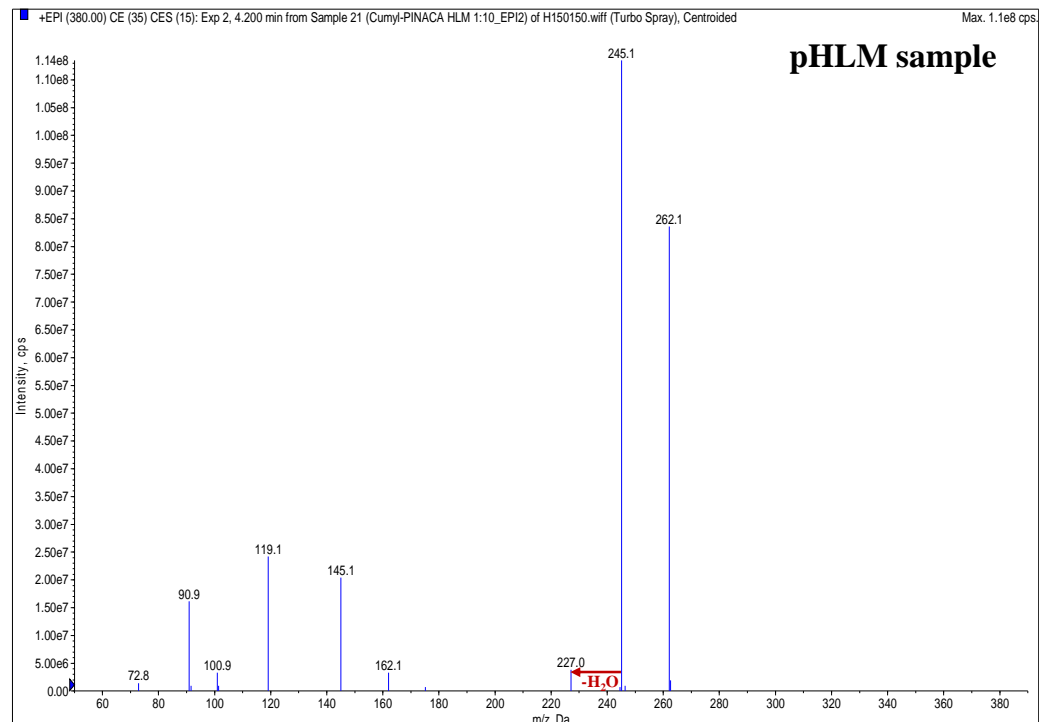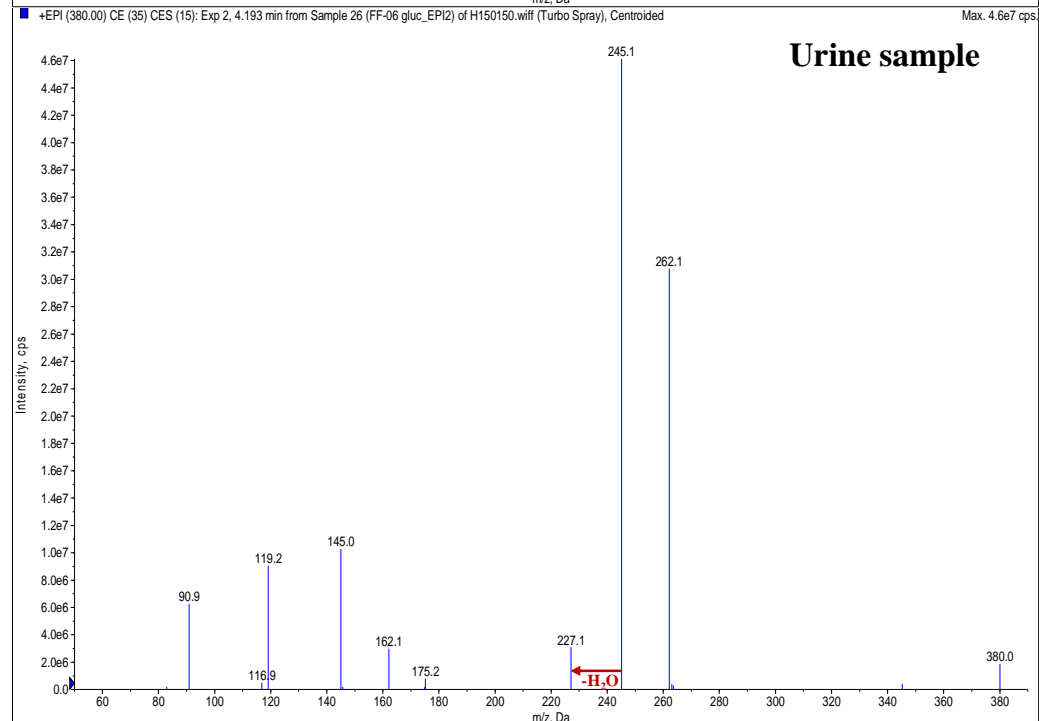

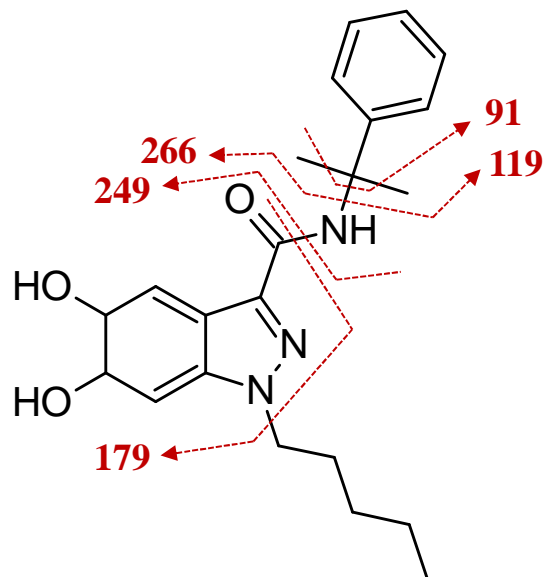

**A06 (RT 4.3 min)**

(dihydrodiol)

Molecular formula:  $C_{22}H_{29}N_3O_3$

Monoisotopic mass: 383.2209 Da

$[M+H]^+$ : 384.2282 Da

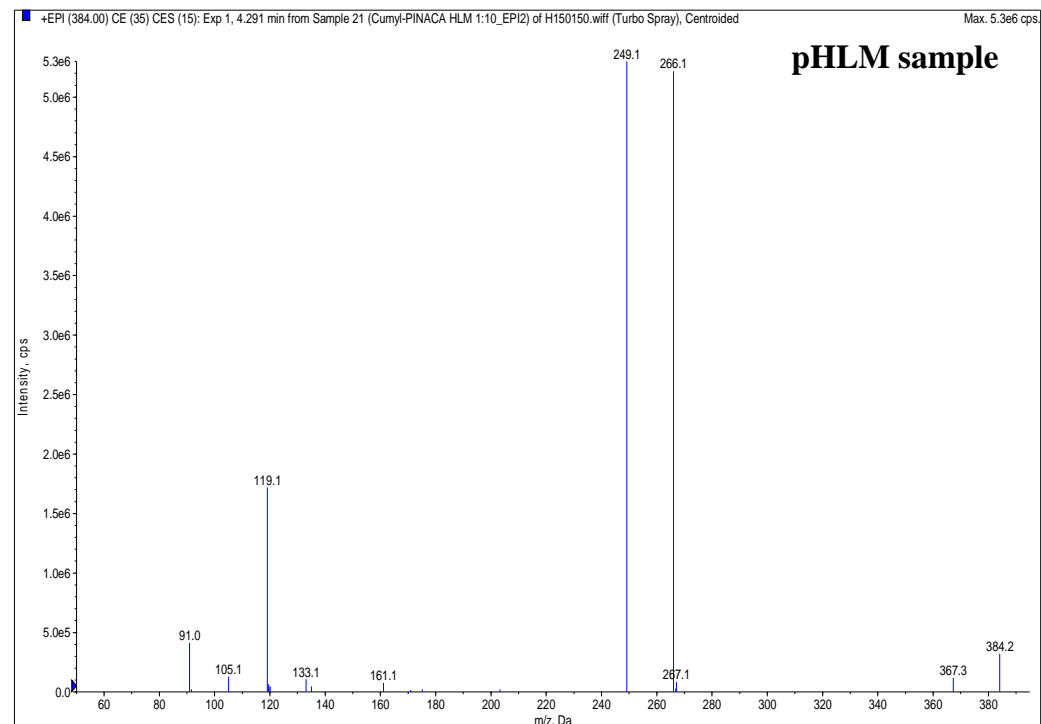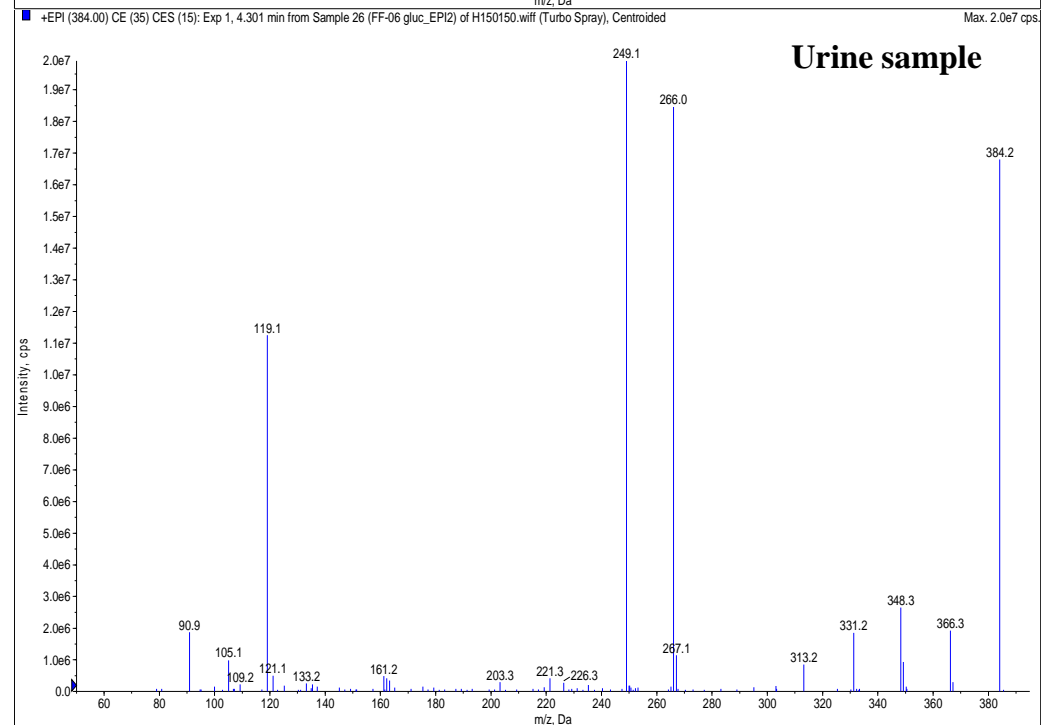





**A07 (RT 4.5 min)**

Molecular formula:  $C_{22}H_{25}N_3O_3$   
 Monoisotopic mass: 379.1896 Da  
 $[M+H]^+$ : 380.1969 Da

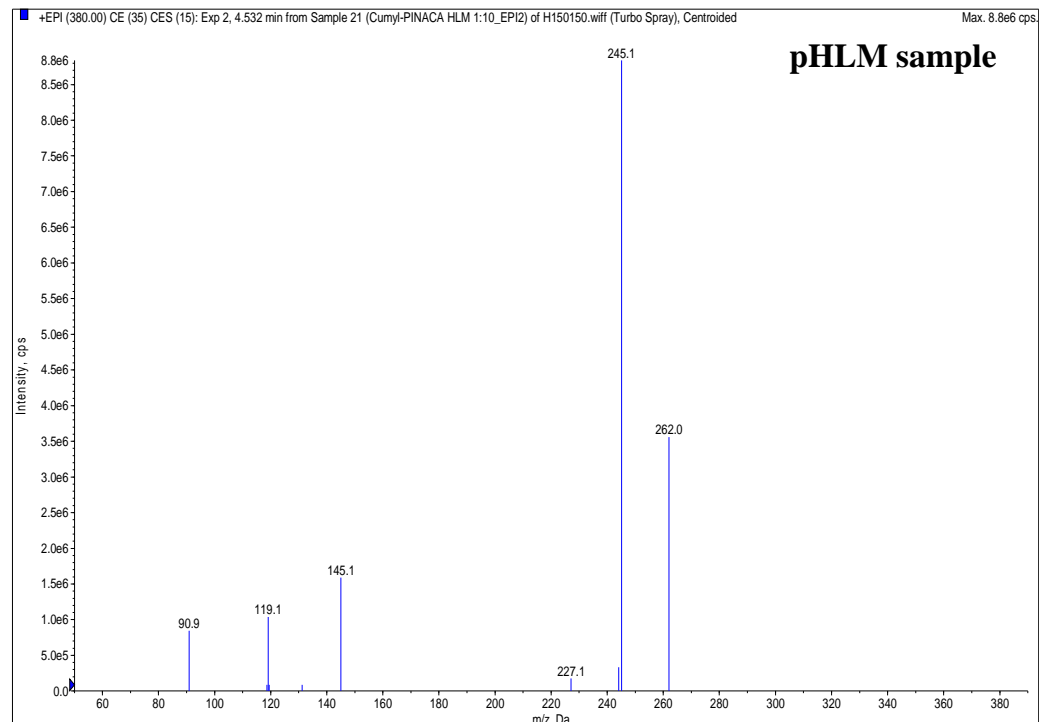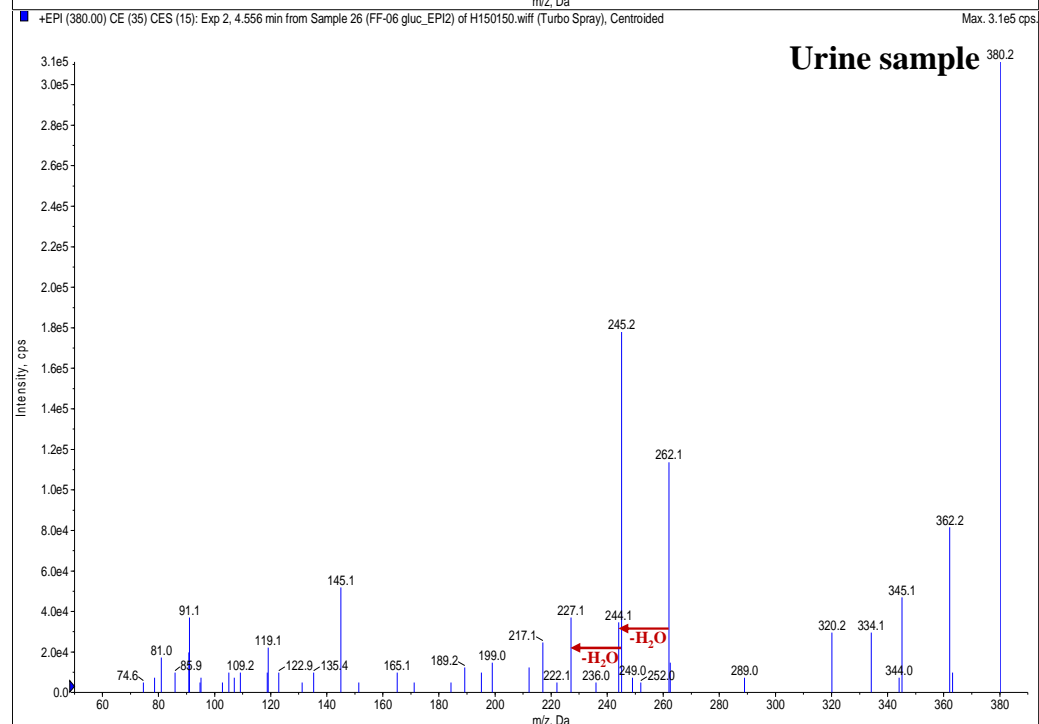

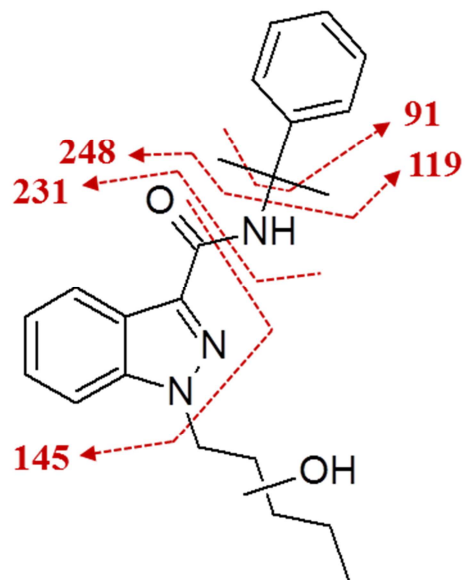

### A08 (RT 4.8 min)

Molecular formula:  $C_{22}H_{27}N_3O_2$   
 Monoisotopic mass: 365.2103 Da  
 $[M+H]^+$ : 366.2176 Da

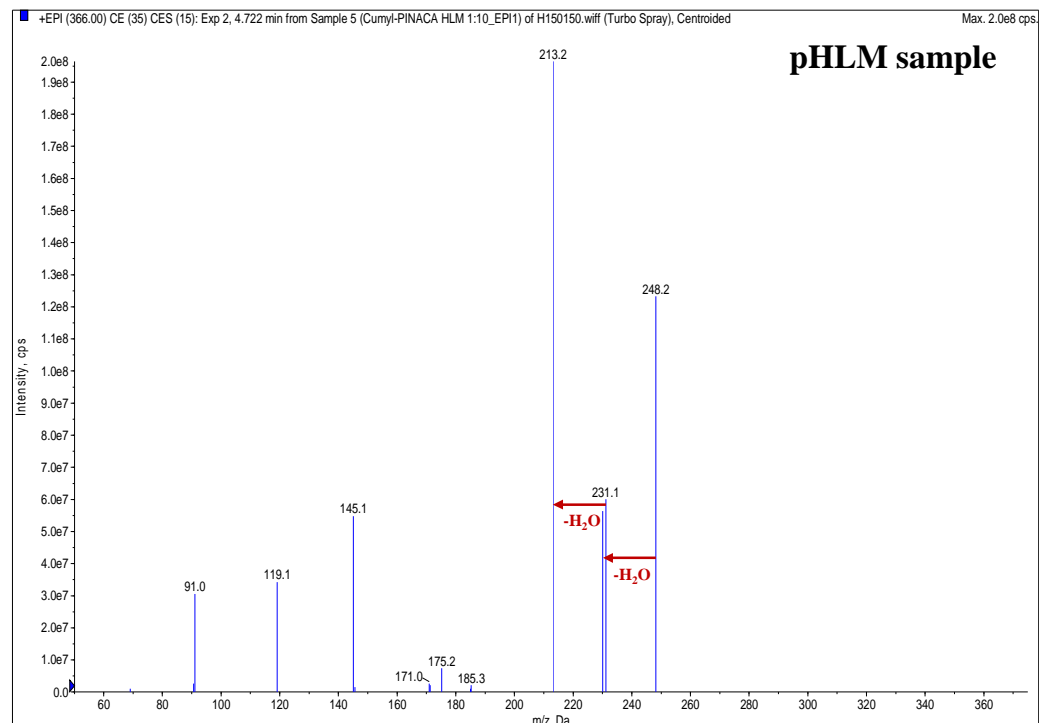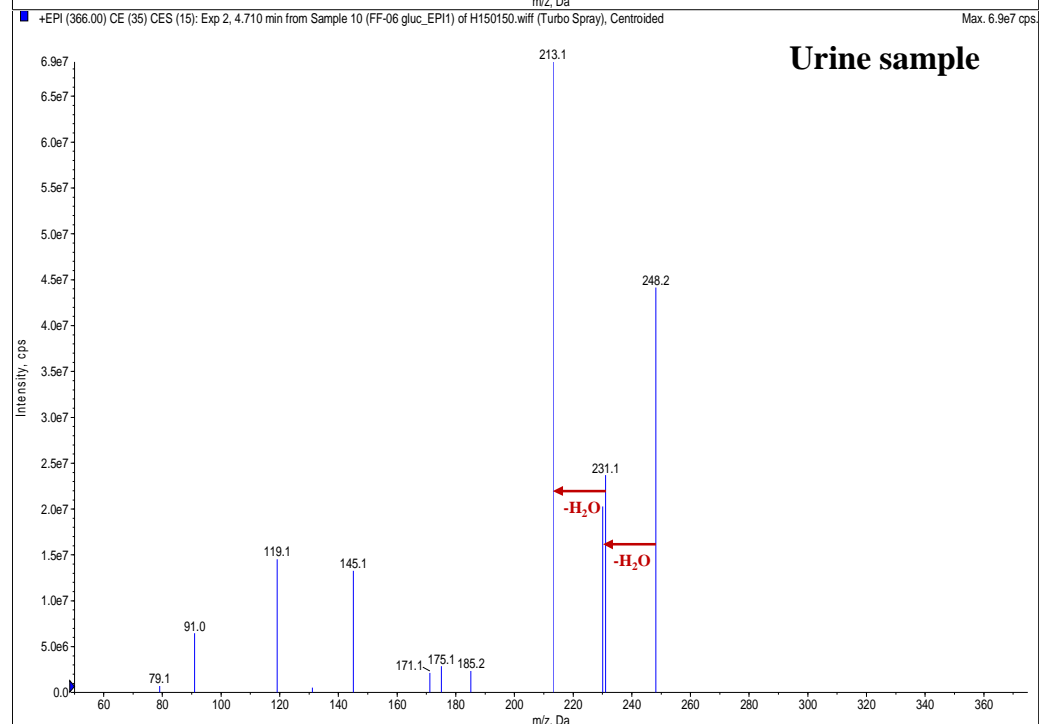

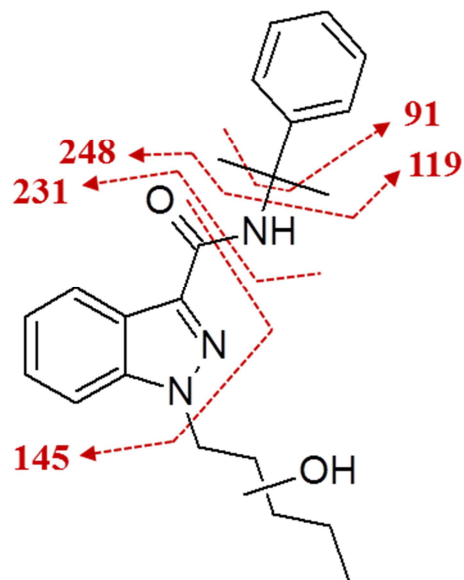

**A09 (RT 5.2 min)**

Molecular formula:  $C_{22}H_{27}N_3O_2$   
 Monoisotopic mass: 365.2103 Da  
 $[M+H]^+$ : 366.2176 Da

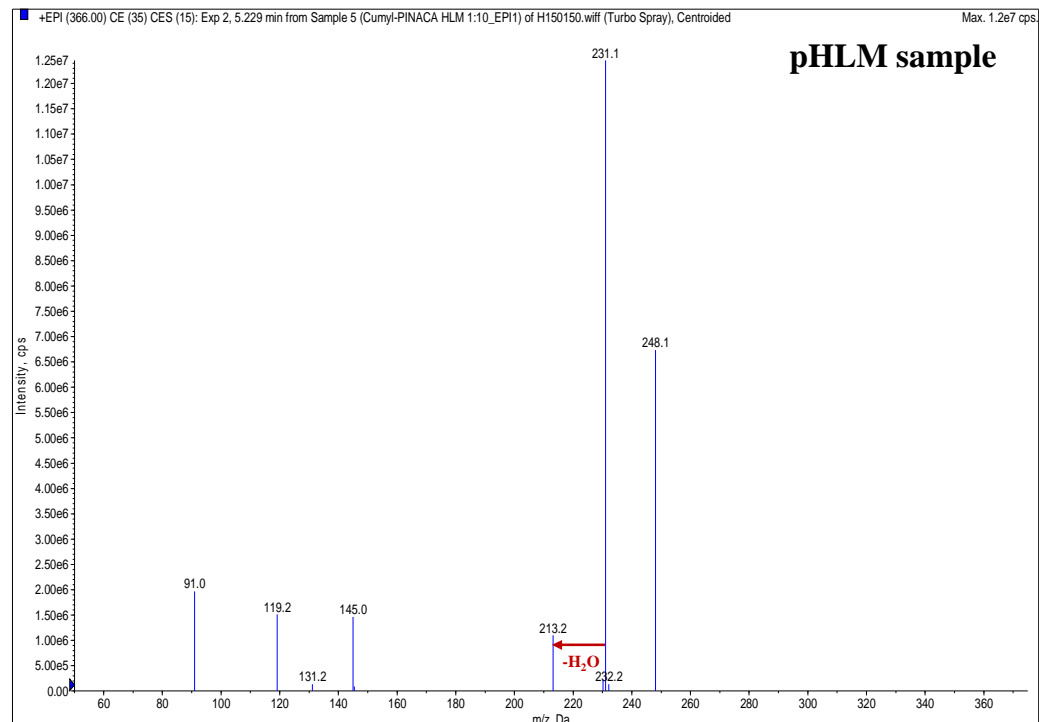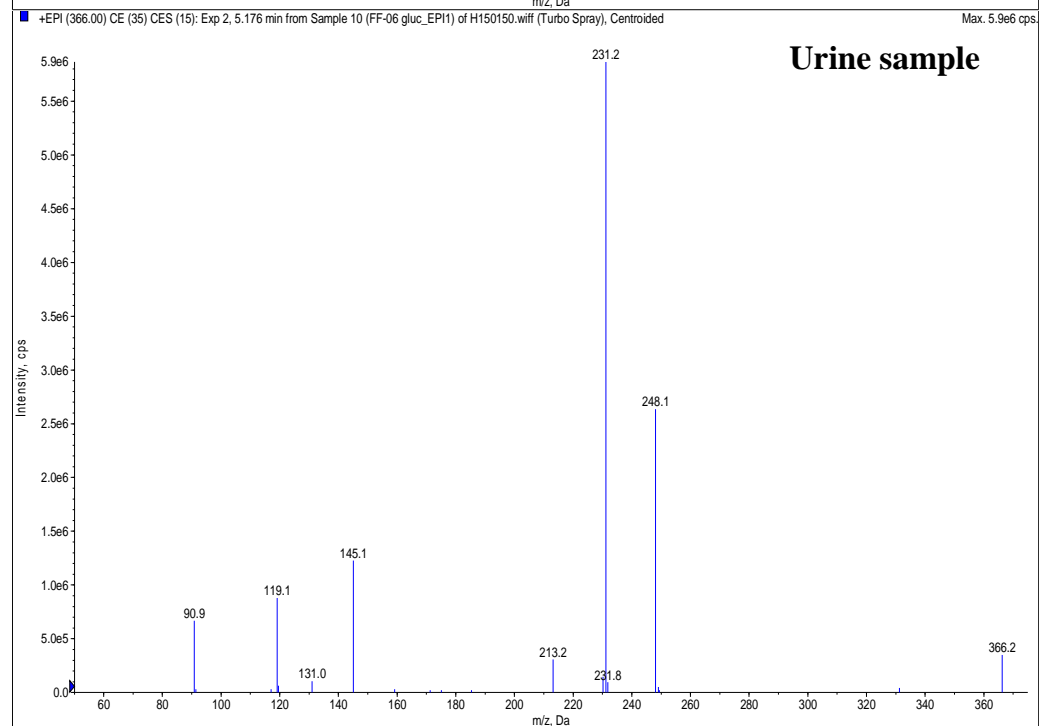

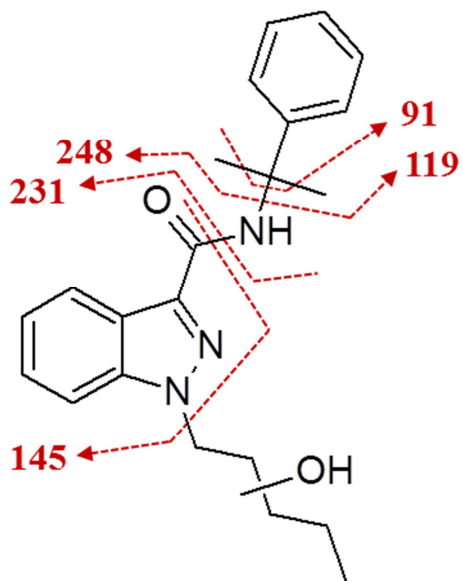

**A10 (RT 5.6 min)**

Molecular formula:  $C_{22}H_{27}N_3O_2$   
 Monoisotopic mass: 365.2103 Da  
 $[M+H]^+$ : 366.2176 Da

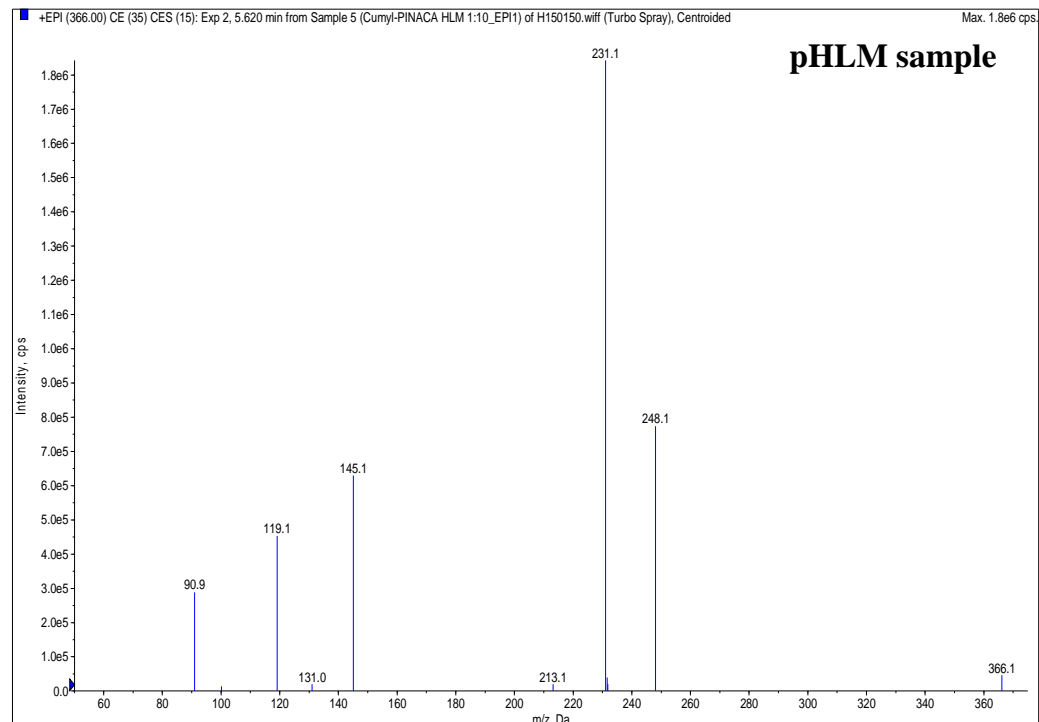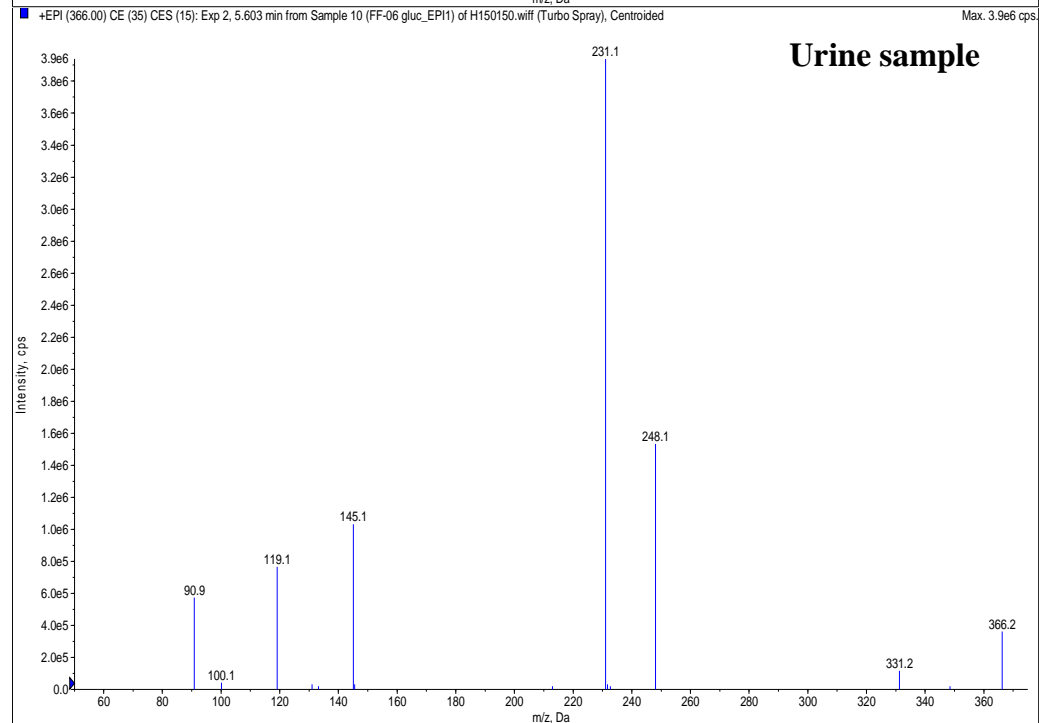

**Fig. S2** GC–EI-MS and proposed fragmentation of the unknown compound, later identified as 5F-Cumyl-PINACA (retention time 11.7 min)

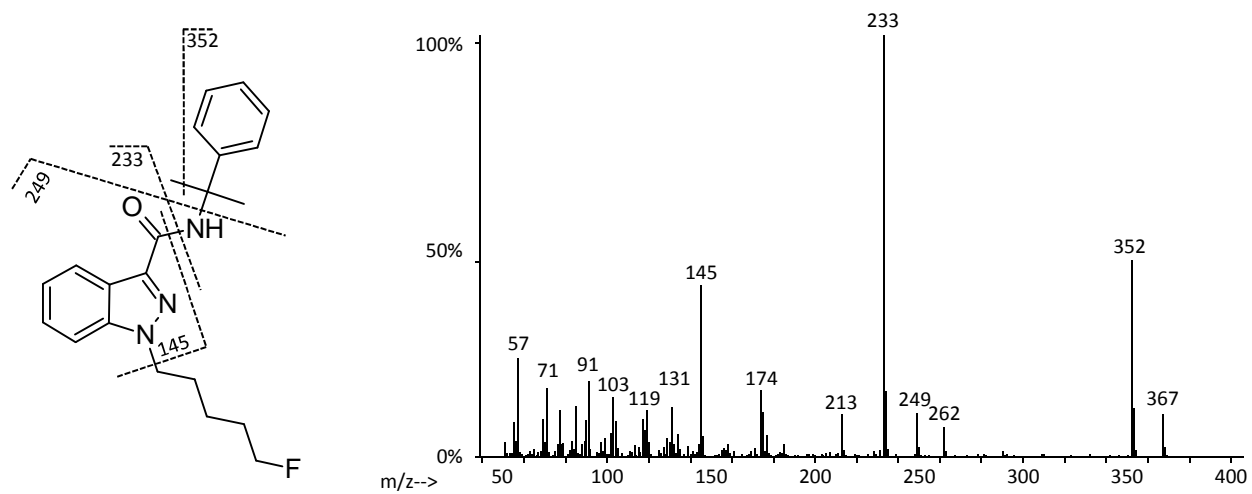

**Fig. S3** Structural formula of the unknown compound identified as 5F-Cumyl-PINACA

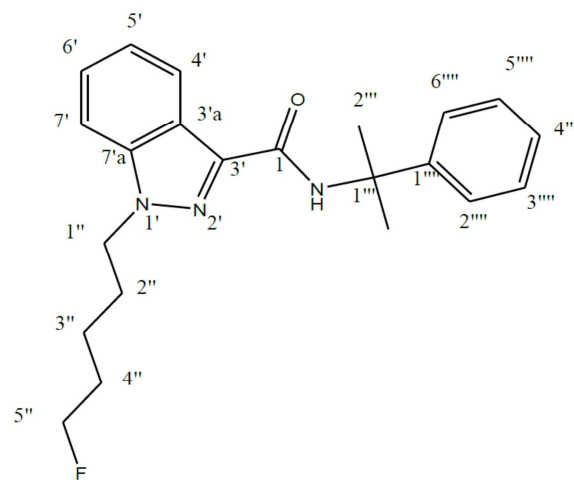

**Fig. S4** Enhanced Product Ion (EPI) spectra of 5F-Cumyl-PINACA metabolites detected in pooled human liver microsome (pHLM) assay samples and authentic urine samples (recorded from urine sample 6 after treatment with glucuronidase) in comparison to the EPI spectrum of the parent compound '5F-Cumyl-PINACA'. Proposed structural formulae and fragmentation is shown for each compound along with their molecular formulae, monoisotopic and single-protonated masses. The EPI scans were recorded with a declustering potential (DP) of 65 V, an entrance potential (EP) of 12 V and a collision energy (CE) of 35 V with a collision energy spread (CES) of  $\pm 15$  V. The position of the dihydrodiol function at the indazole ring for B01 is exemplary and was not confirmed

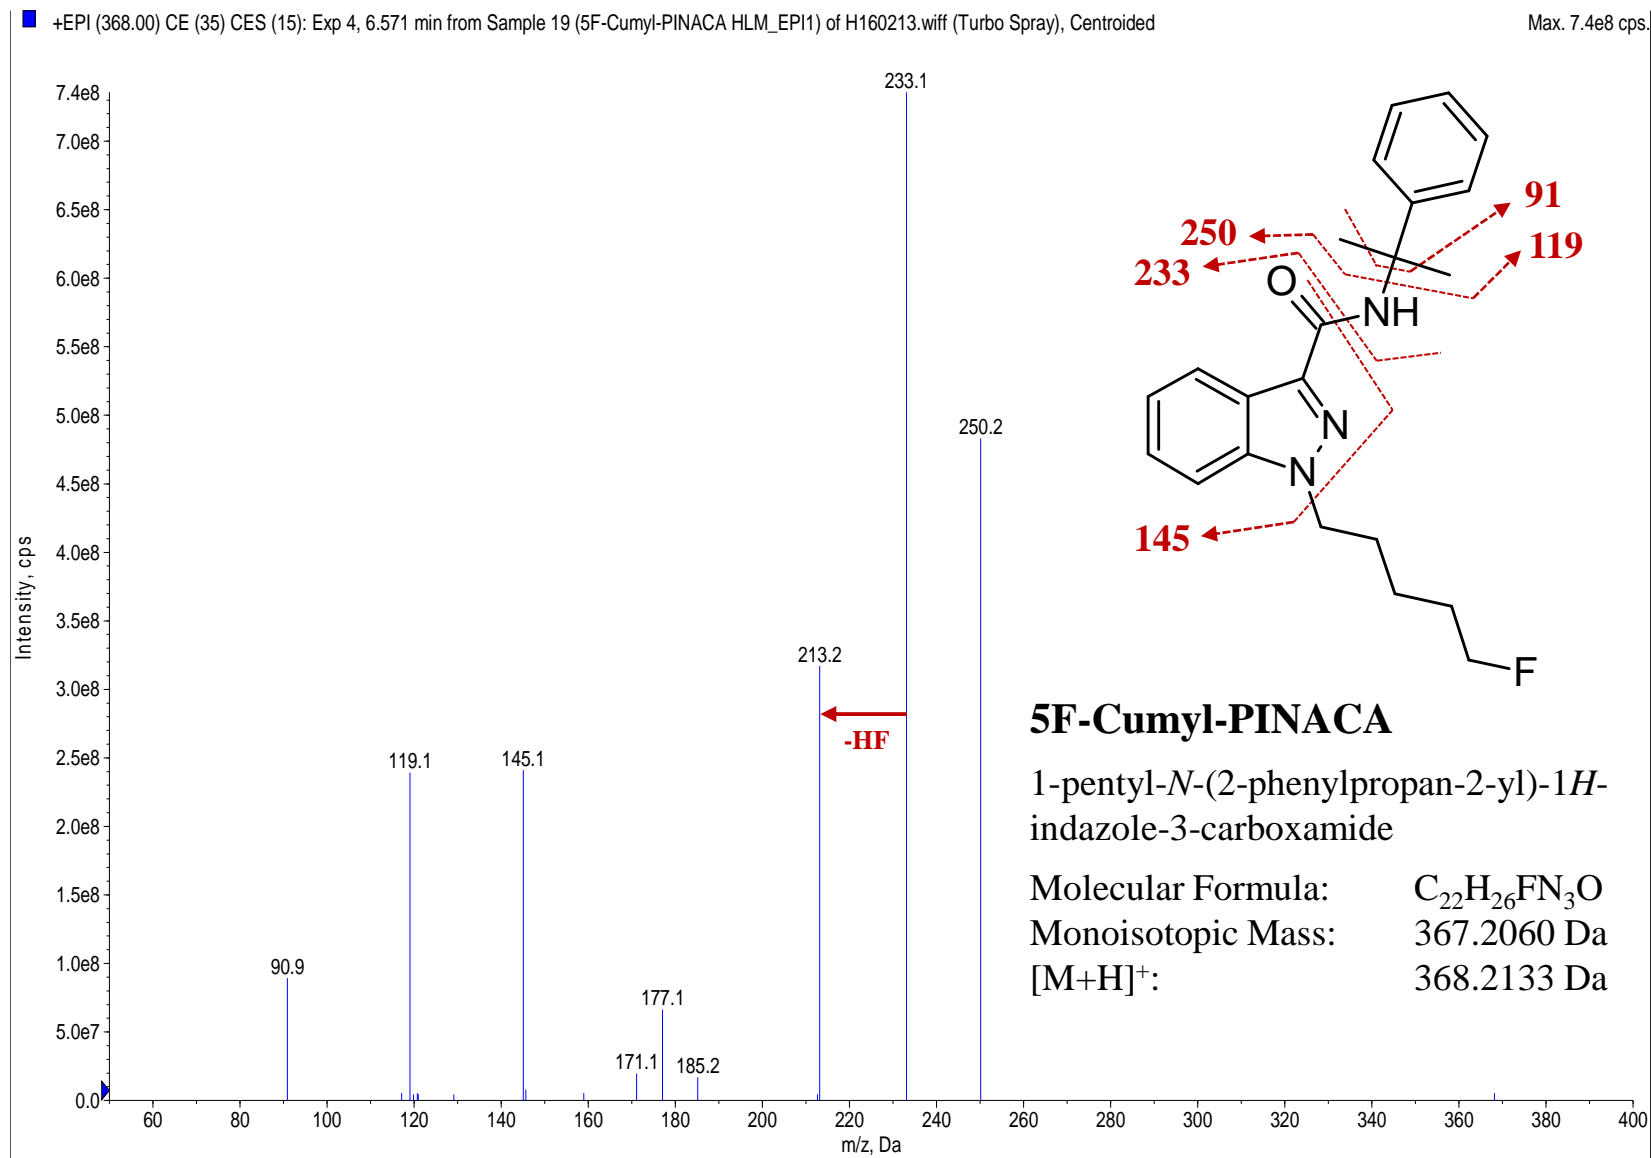

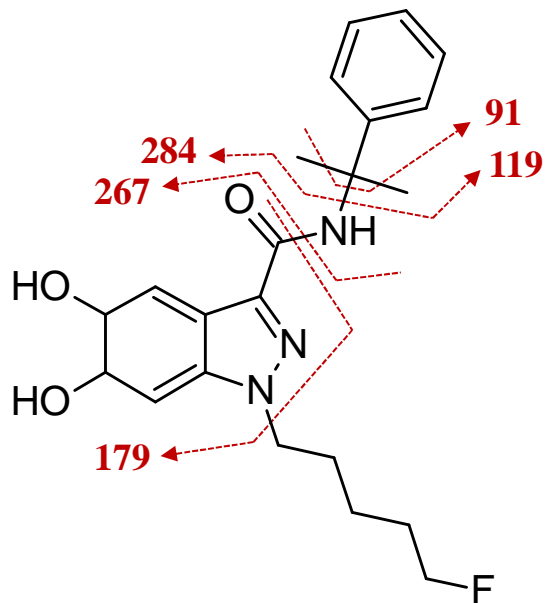

**B01 (RT 3.6 min)**

(dihydrodiol)

Molecular formula:  $C_{22}H_{28}FN_3O_3$

Monoisotopic mass: 401.2115 Da

$[M+H]^+$ : 402.2187 Da

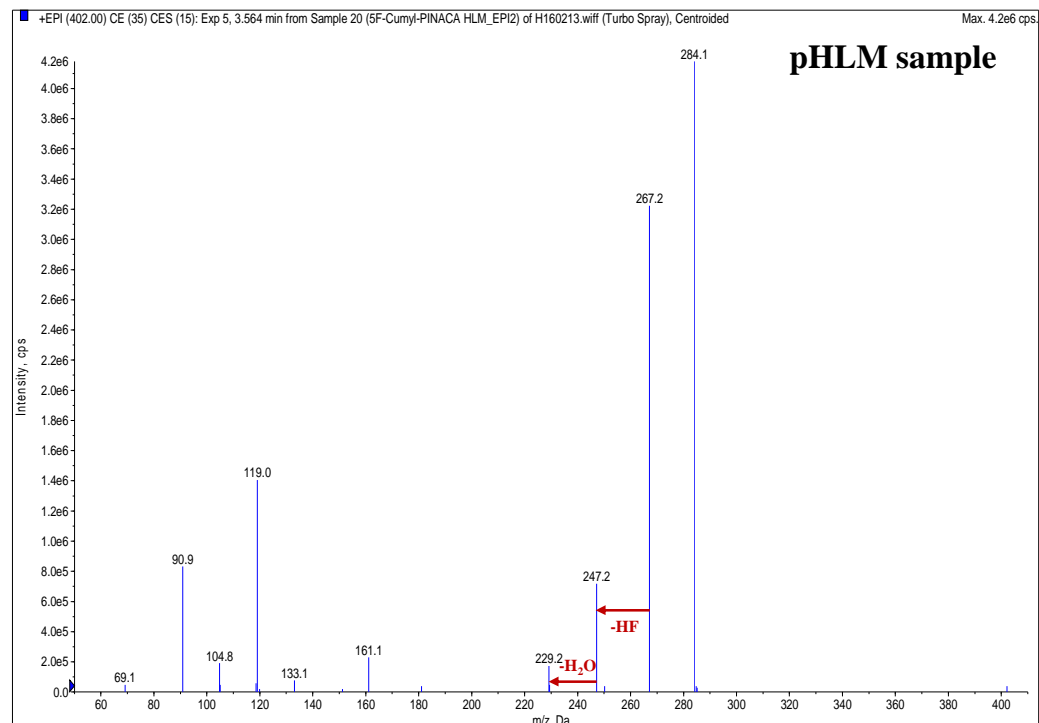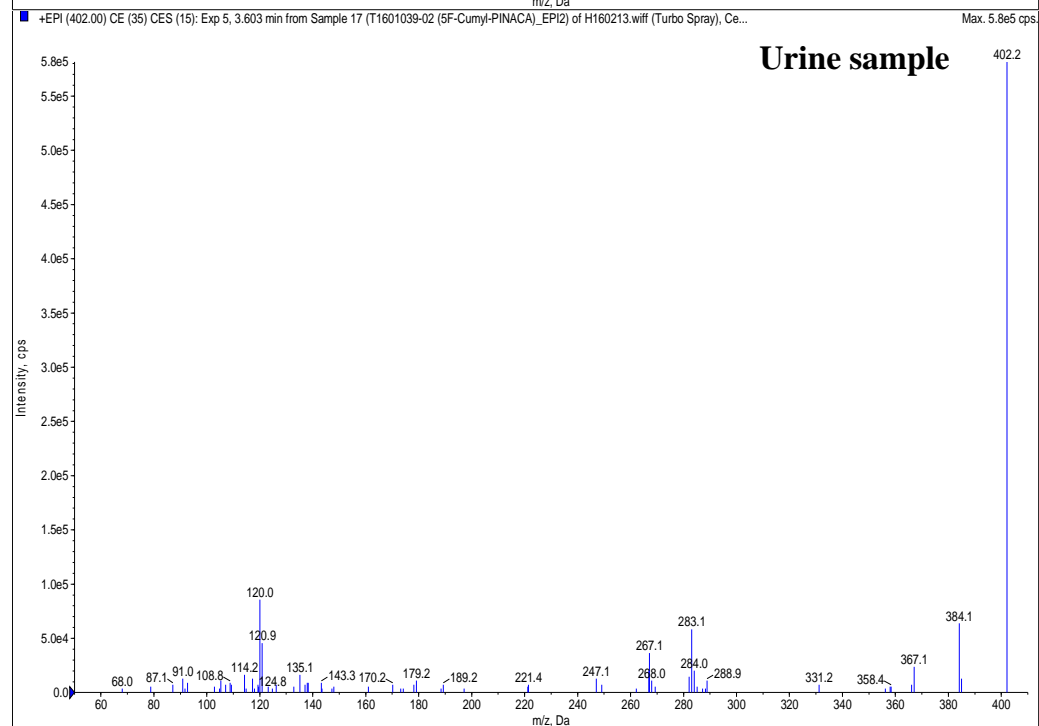



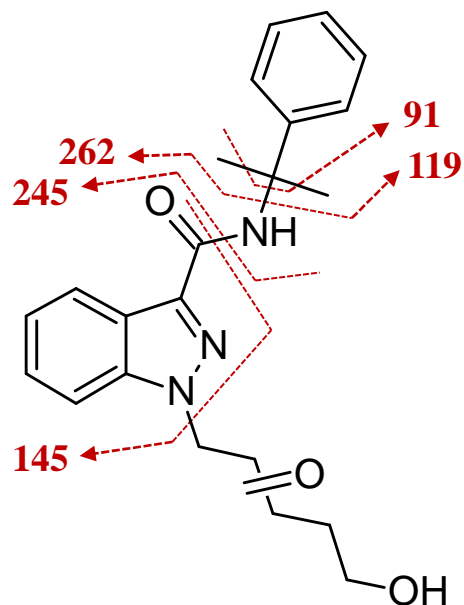

**B02 (RT 4.5 min)**

Molecular Formula:  $C_{22}H_{25}N_3O_3$

Monoisotopic Mass: 379.1896 Da

$[M+H]^+$ : 380.1969 Da

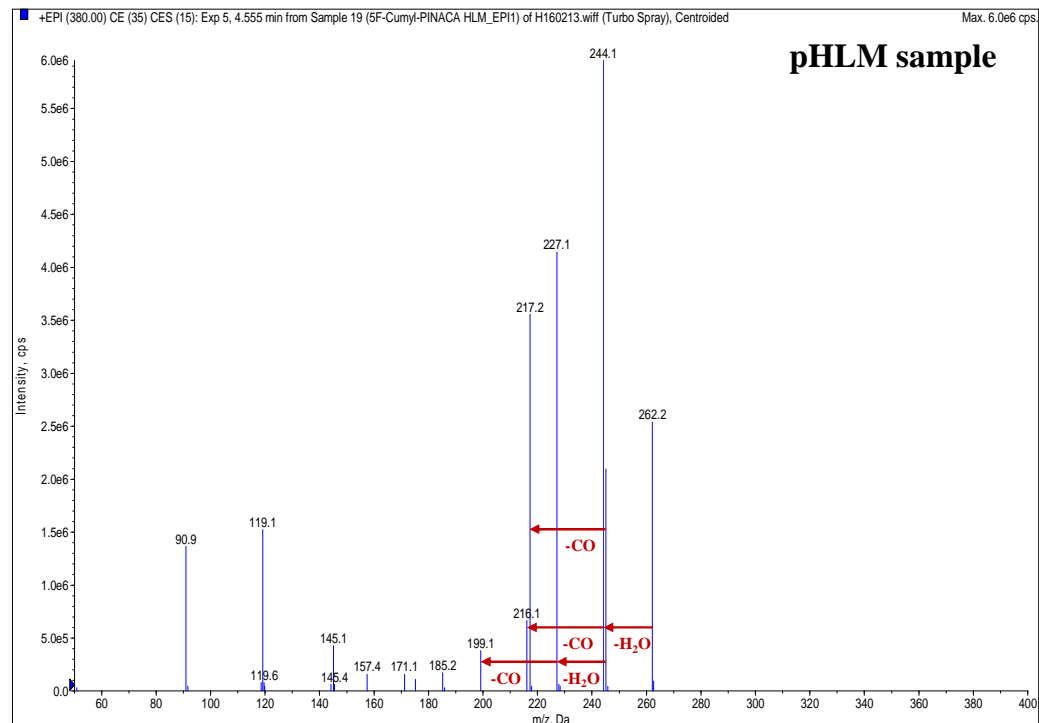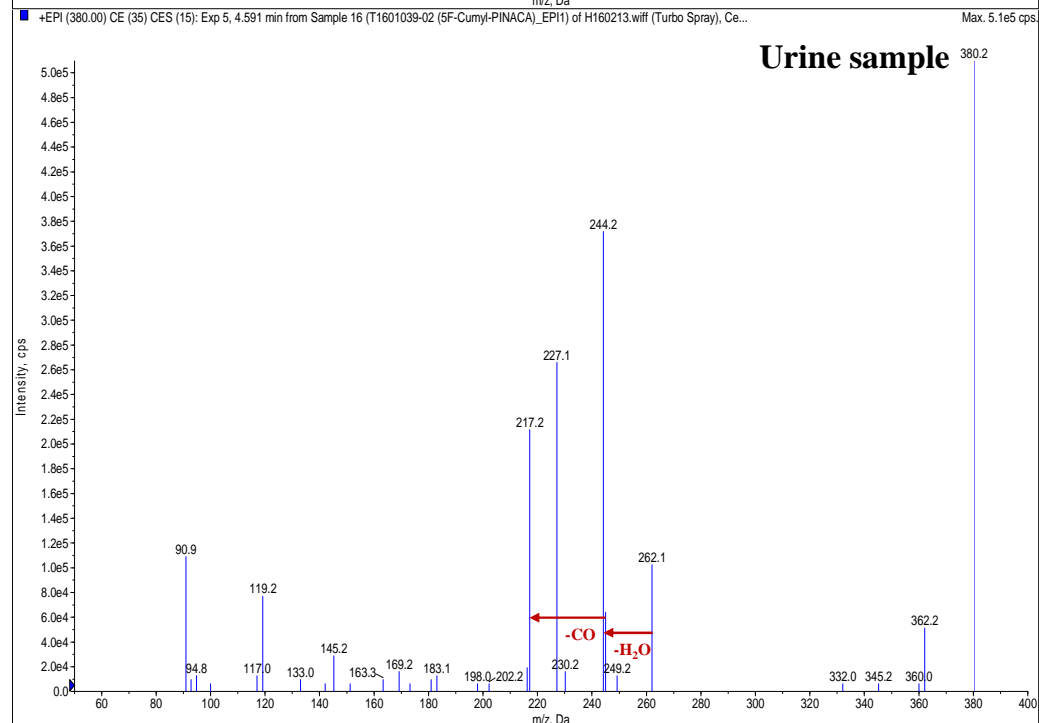

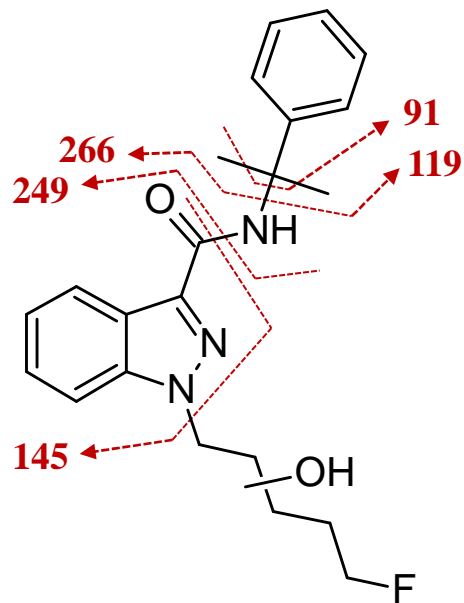

**B03 (RT 4.7 min)**

Molecular Formula:  $C_{22}H_{26}FN_3O_2$

Monoisotopic Mass: 383.2009 Da

$[M+H]^+$ : 384.2082 Da

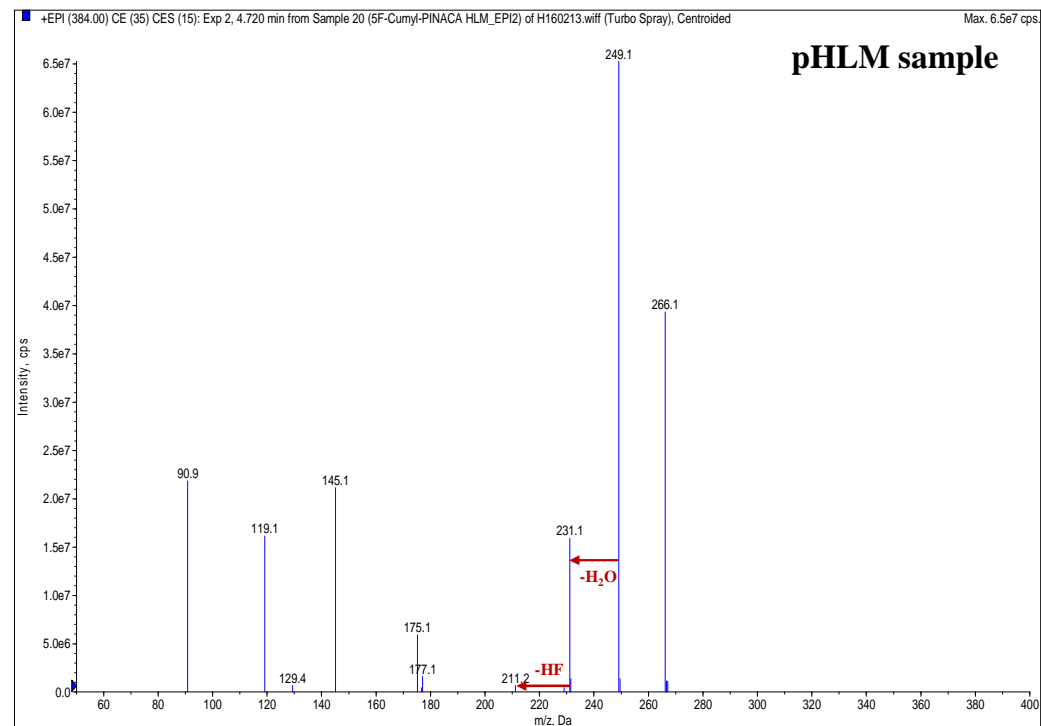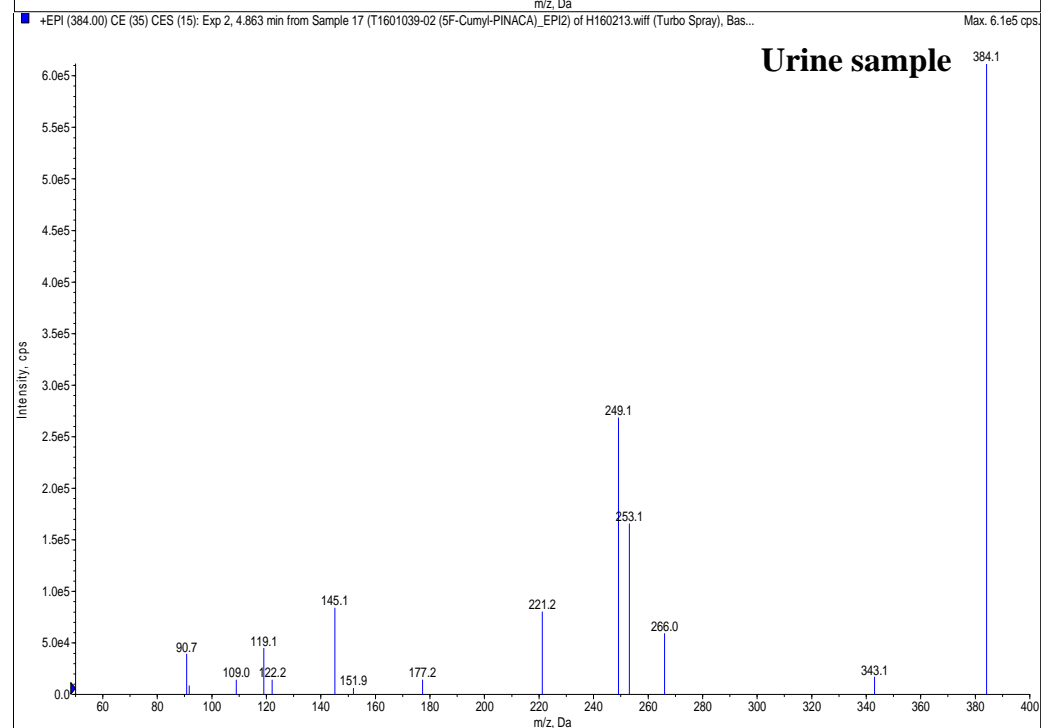

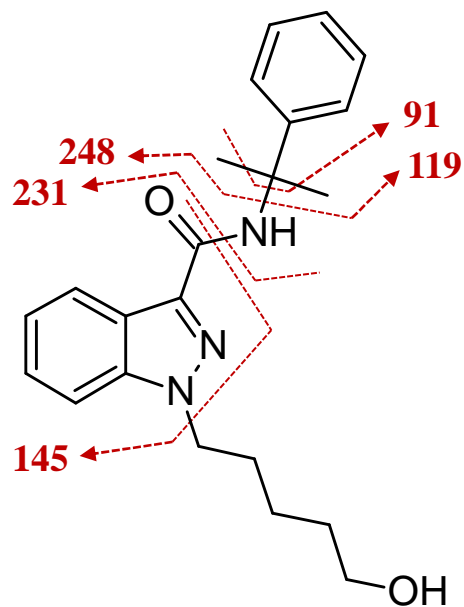

**B04 (RT 4.8 min)**

Molecular Formula:  $C_{22}H_{27}N_3O_2$   
 Monoisotopic Mass: 365.2103 Da  
 $[M+H]^+$ : 366.2176 Da

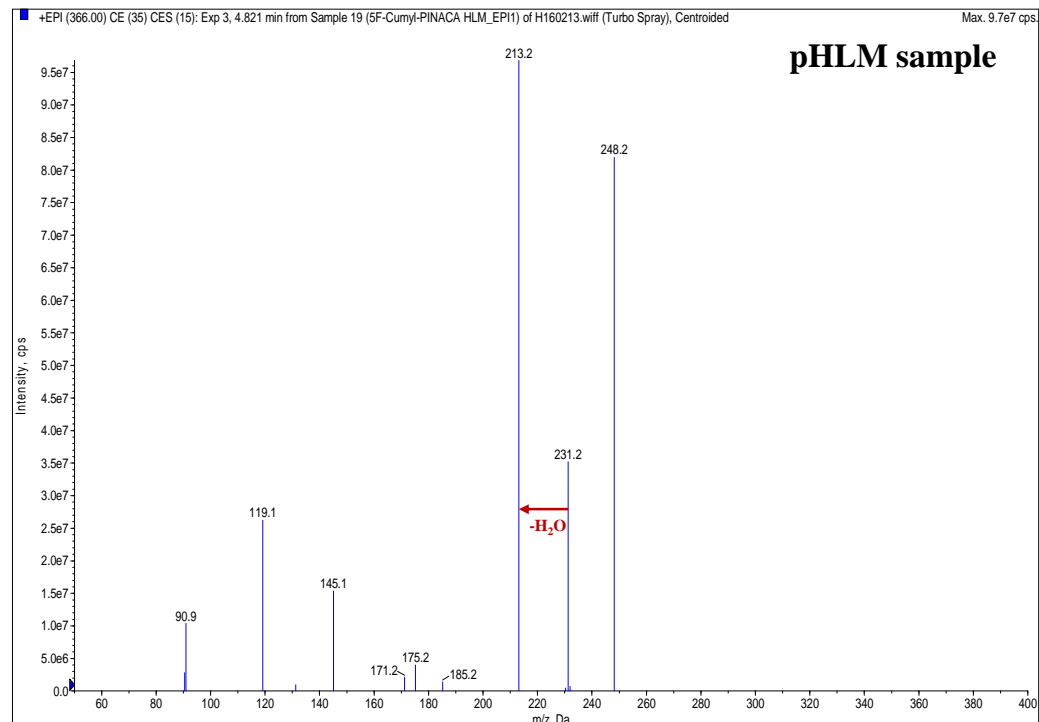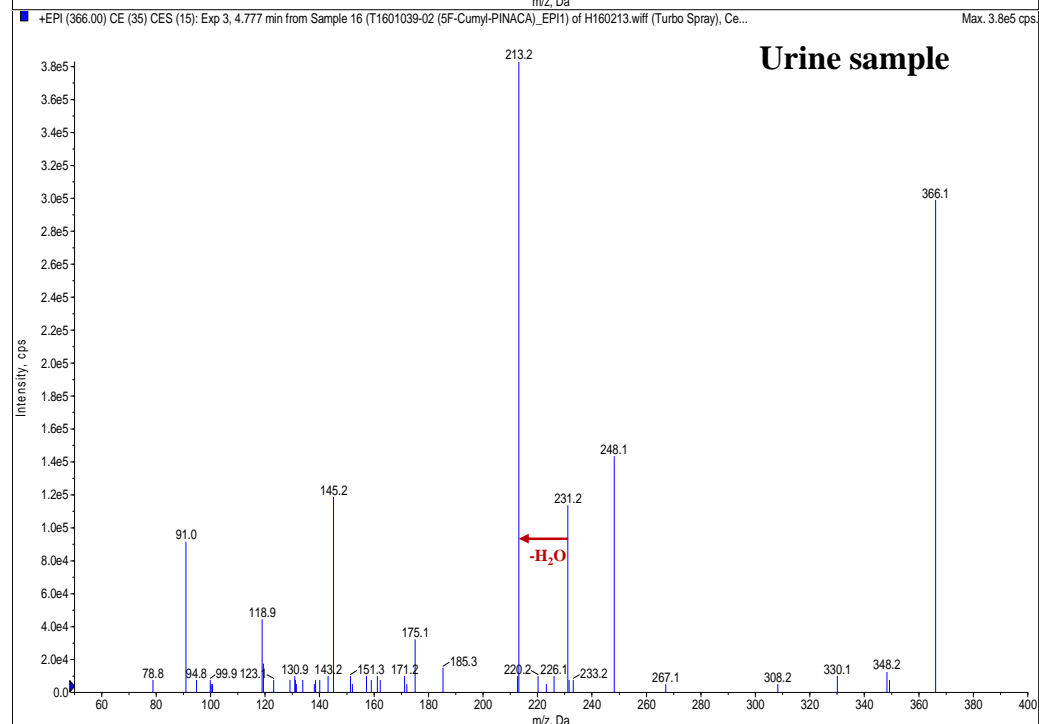

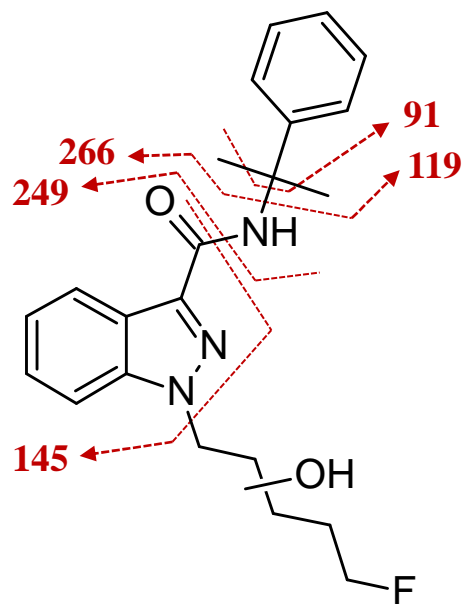

**B05 (RT 4.8 min)**

Molecular Formula:  $C_{22}H_{26}FN_3O_2$

Monoisotopic Mass: 383.2009 Da

$[M+H]^+$ : 384.2082 Da

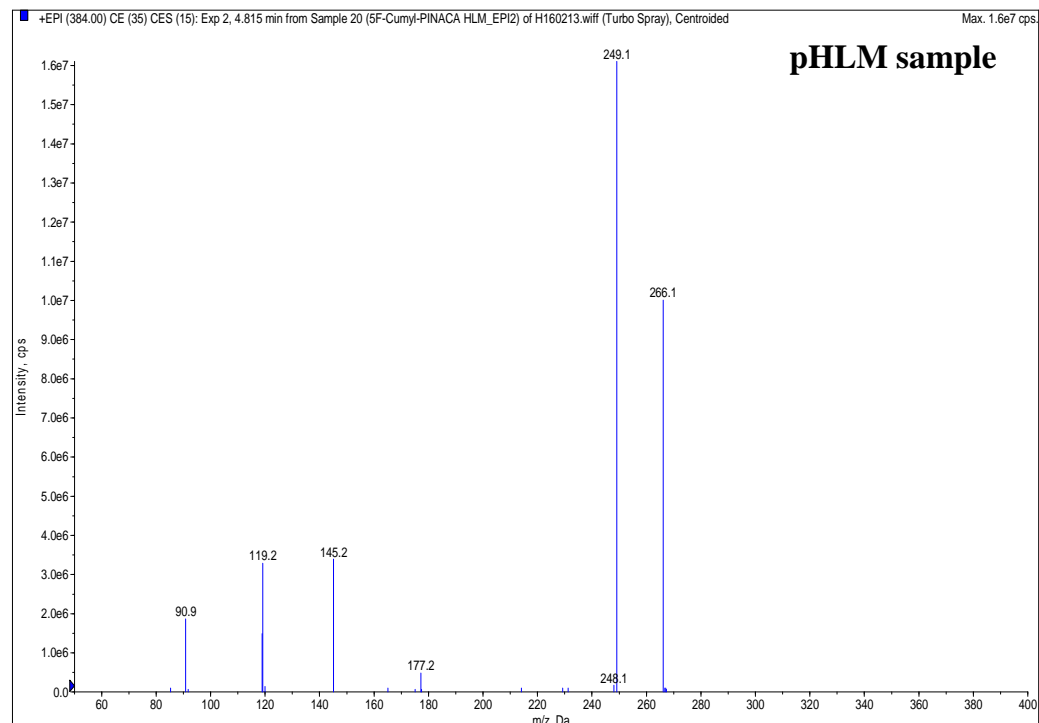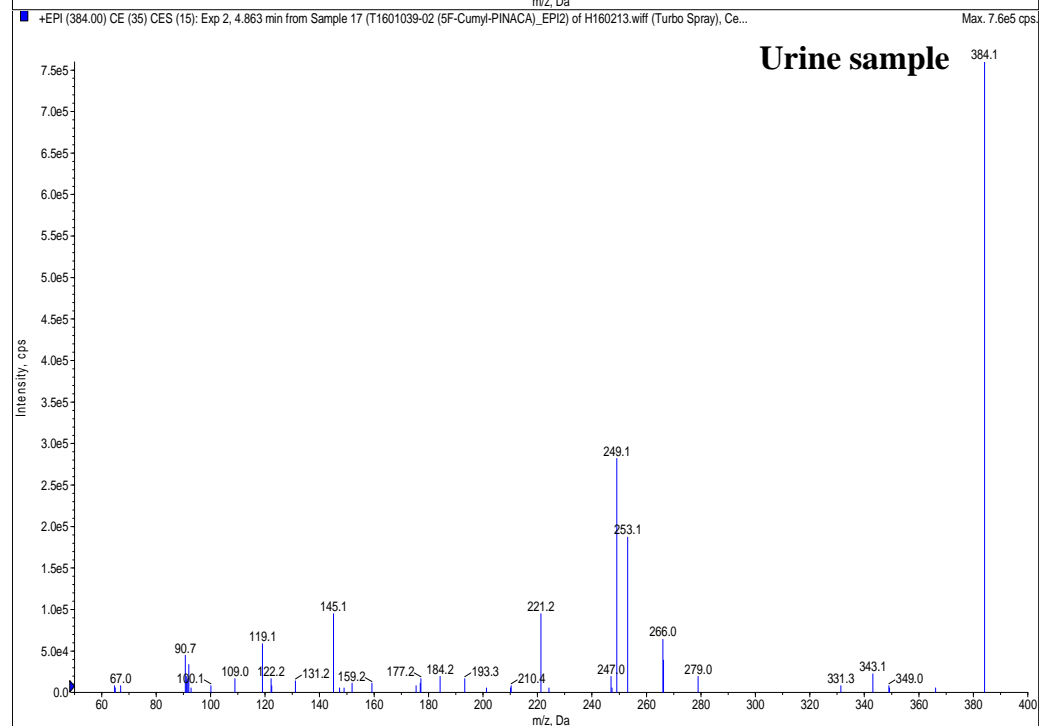



**B06 (RT 5.0 min)**

Molecular Formula:  $C_{22}H_{26}FN_3O_2$

Monoisotopic Mass: 383.2009 Da

$[M+H]^+$ : 384.2082 Da

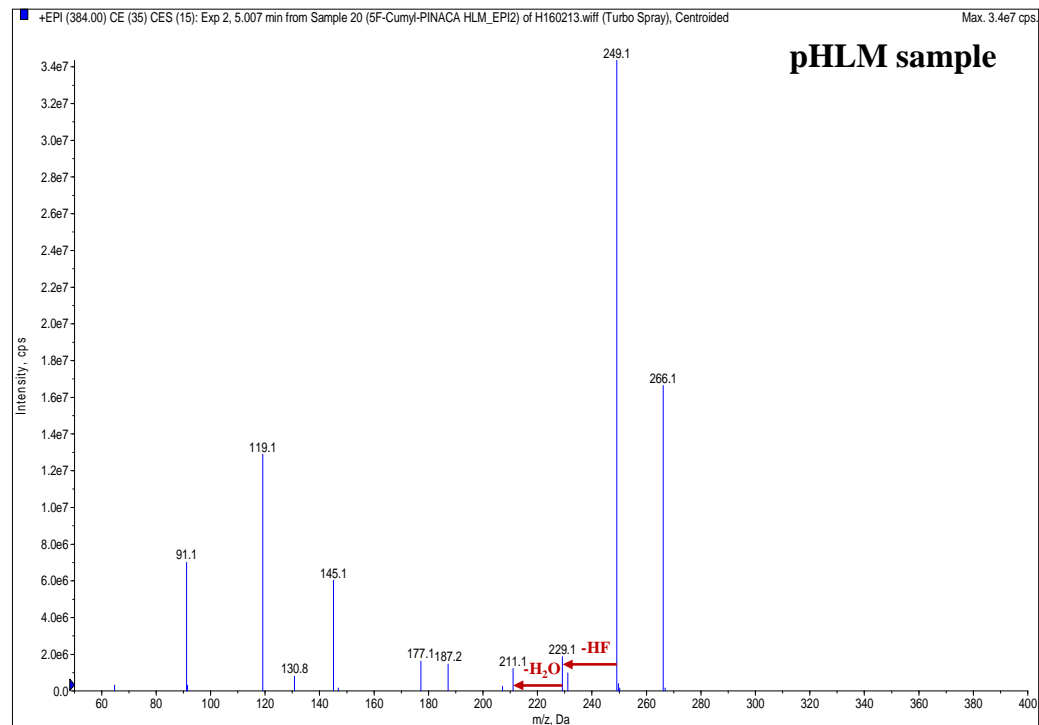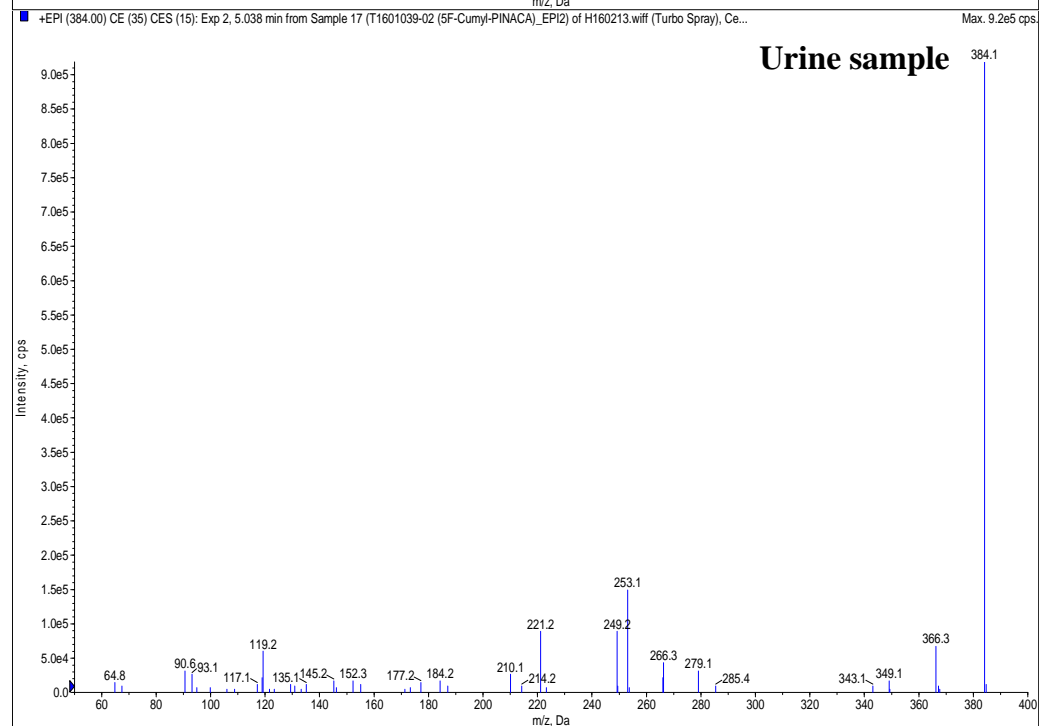

Supplement: MOESM1 [file 16719930]
