# Supplementary material for: 5F-Cumyl-PINACA in ‘e-liquids’ for electronic cigarettes: comprehensive characterization of a new type of synthetic cannabinoid in a trendy product including investigations on the in vitro and in vivo phase I metabolism of 5F-Cumyl-PINACA and its non-fluorinated analog Cumyl-PINACA
Source: Springer Nature journal article supplement (doi:10.1007/s11419-018-0451-8), 2018-11-13
Supplement: MOESM2 [file 16719930]

## Electronic supplementary material – Forensic Toxicology

### **5F-Cumyl-PINACA in ‘e-liquids’ for electronic cigarettes: comprehensive characterization of a new type of synthetic cannabinoid in a trendy product including investigations on the in vitro and in vivo phase I metabolism of 5F-Cumyl-PINACA and its non-fluorinated analog Cumyl-PINACA**

Verena Angerer<sup>1,2,†</sup>, Florian Franz<sup>1,2,3,†</sup>, Bjoern Moosmann<sup>4</sup>, Philippe Bise<sup>5</sup>, Volker Auwärter<sup>1,2,\*</sup>

<sup>1</sup> Institute of Forensic Medicine, Forensic Toxicology, Medical Center – University of Freiburg, Albertstr. 9, 79104 Freiburg, Germany

<sup>2</sup> Faculty of Medicine, University of Freiburg, Breisacher Str. 153, 79110 Freiburg, Germany

<sup>3</sup> Hermann Staudinger Graduate School, University of Freiburg, Hebelstr. 27, 79104 Freiburg, Germany

<sup>4</sup> Institute of Forensic Medicine, Forensic Toxicology, Kantonsspital St.Gallen, Rorschacher Str. 95, 9007 St.Gallen, Switzerland

<sup>5</sup> Institute for Pharmaceutical Sciences, University of Freiburg, Albertstr. 25, 79104 Freiburg, Germany

† These authors have contributed equally to this manuscript.

\* Corresponding author:

Prof. Volker Auwärter

Tel.: +49 761 203 6862

Fax: +49 761 203 6826

Email: volker.auwaerter@uniklinik-freiburg.de

**Table S1** Specific MRM mass transitions of Cumyl-PINACA and its detected metabolites

| Type                    | Q1  | Q3  | Dwell time [msec] | DP [V] | EP [V] | CE [V] | CXP [V] | Metabolite ID |
|-------------------------|-----|-----|-------------------|--------|--------|--------|---------|---------------|
| Cumyl-PINACA            | 350 | 215 | 20                | 40     | 8      | 30     | 25      | A00           |
|                         | 350 | 145 | 20                | 40     | 8      | 55     | 17      |               |
| Mono-hydroxylation (+O) | 366 | 231 | 20                | 40     | 8      | 30     | 25      | A08, A09, A10 |
|                         | 366 | 145 | 20                | 40     | 8      | 55     | 17      |               |
| Di-hydroxylation (+2O)  | 382 | 231 | 20                | 40     | 8      | 30     | 25      | A01           |
|                         | 382 | 145 | 20                | 40     | 8      | 55     | 17      |               |
| Di-hydroxylation (+2O)  | 382 | 247 | 20                | 40     | 8      | 30     | 25      | A02, A03      |
|                         | 382 | 145 | 20                | 40     | 8      | 55     | 17      |               |
| Dihydrodiol (+2H, +2O)  | 384 | 249 | 20                | 40     | 8      | 30     | 25      | A06           |
|                         | 384 | 119 | 20                | 40     | 8      | 55     | 17      |               |
| (+2O, -2H)              | 380 | 229 | 20                | 40     | 8      | 30     | 25      | A04           |
|                         | 380 | 145 | 20                | 40     | 8      | 55     | 17      |               |
| (+2O, -2H)              | 380 | 245 | 20                | 40     | 8      | 30     | 25      | A05, A07      |
|                         | 380 | 145 | 20                | 40     | 8      | 55     | 17      |               |

Q1;  $m/z$  of the precursor ion

Q3;  $m/z$  of the fragment ion

DP; Declustering potential

EP; Entrance potential

CE; Collision energy

CXP; Cell exit potential

**Table S2** Specific MRM mass transitions of 5F-Cumyl-PINACA and its detected metabolites

| Type                                   | Q1  | Q3  | Dwell time [msec] | DP [V] | EP [V] | CE [V] | CXP [V] | Metabolite ID |
|----------------------------------------|-----|-----|-------------------|--------|--------|--------|---------|---------------|
| 5F-Cumyl-PINACA                        | 368 | 233 | 10                | 65     | 12     | 30     | 8       | B00           |
|                                        | 368 | 145 | 10                | 65     | 12     | 55     | 5       |               |
| Monohydroxylation (+O)                 | 384 | 249 | 10                | 65     | 12     | 30     | 8       | B03, B05, B06 |
|                                        | 384 | 145 | 10                | 65     | 12     | 55     | 5       |               |
| Dihydrodiol (+2H, +2O)                 | 402 | 267 | 10                | 65     | 12     | 30     | 8       | B01           |
|                                        | 402 | 179 | 10                | 65     | 12     | 55     | 5       |               |
| Defluorination (+H, +O, -F)            | 366 | 231 | 10                | 65     | 12     | 30     | 8       | B04           |
|                                        | 366 | 145 | 10                | 65     | 12     | 55     | 5       |               |
| <i>N</i> -Pentanoic acid (+2O, -H, -F) | 380 | 245 | 10                | 65     | 12     | 30     | 8       | B02           |
|                                        | 380 | 145 | 10                | 65     | 12     | 55     | 5       |               |

Q1;  $m/z$  of the precursor ion

Q3;  $m/z$  of the fragment ion

DP; Declustering potential

EP; Entrance potential

CE; Collision energy

CXP; Cell exit potential

**Table S3** Detected in vivo phase I metabolites of Cumyl-PINACA in each of the urine samples in the order of their retention time (RT)

| ID  | Type              | RT [min] | Formula                                                       | [M+H] <sup>+</sup> | Urine 00 | Urine 01 | Urine 02 | Urine 03 | Urine 04 | Urine 05 | Urine 06 | Urine 07 | Urine 08 | Urine 09 | Urine 10 | Urine 11 | Urine 12 | Urine 13 | Urine 14 | Urine 15 | Urine 16 | pHLM    |
|-----|-------------------|----------|---------------------------------------------------------------|--------------------|----------|----------|----------|----------|----------|----------|----------|----------|----------|----------|----------|----------|----------|----------|----------|----------|----------|---------|
|     |                   |          |                                                               |                    | 0 h      | 0.2 h    | 3.2 h    | 6 h      | 16 h     | 20.3 h   | 22.3 h   | 26.3 h   | 29.3 h   | 37.2 h   | 39 h     | 88.5 h   | 110.3 h  | 134 h    | 157.5 h  | 182.5 h  | 205.5 h  |         |
| A01 | Dihydroxylation   | 3.3      | C <sub>22</sub> H <sub>27</sub> N <sub>3</sub> O <sub>3</sub> | 382.2125           | n.d.     | n.d.     | 4.5E+04  | 6.4E+05  | 4.3E+05  | 2.0E+05  | 2.1E+05  | 2.0E+05  | 1.5E+05  | 1.1E+05  | 1.1E+05  | n.d.     | n.d.     | n.d.     | n.d.     | n.d.     | n.d.     | 1.9E+06 |
| A02 | Dihydroxylation   | 3.4      | C <sub>22</sub> H <sub>27</sub> N <sub>3</sub> O <sub>3</sub> | 382.2125           | n.d.     | n.d.     | 4.7E+04  | 1.2E+06  | 1.1E+06  | 3.9E+05  | 2.1E+05  | 1.8E+05  | 1.2E+05  | 6.7E+04  | 5.5E+04  | n.d.     | n.d.     | n.d.     | n.d.     | n.d.     | n.d.     | 2.8E+07 |
| A03 | Dihydroxylation   | 3.5      | C <sub>22</sub> H <sub>27</sub> N <sub>3</sub> O <sub>3</sub> | 382.2125           | n.d.     | n.d.     | 1.1E+05  | 3.1E+06  | 3.9E+06  | 1.6E+06  | 1.3E+06  | 1.4E+06  | 1.0E+06  | 6.0E+05  | 5.8E+05  | n.d.     | n.d.     | n.d.     | n.d.     | n.d.     | n.d.     | 4.2E+07 |
| A04 | (+2O, -2H)        | 3.7      | C <sub>22</sub> H <sub>25</sub> N <sub>3</sub> O <sub>3</sub> | 380.1969           | n.d.     | n.d.     | 5.4E+04  | 1.3E+06  | 9.8E+05  | 4.9E+05  | 6.7E+05  | 6.2E+05  | 5.2E+05  | 3.3E+05  | 3.6E+05  | n.d.     | n.d.     | n.d.     | n.d.     | n.d.     | n.d.     | 2.6E+06 |
| A05 | (+2O-, 2H)        | 4.2      | C <sub>22</sub> H <sub>25</sub> N <sub>3</sub> O <sub>3</sub> | 380.1969           | n.d.     | n.d.     | 1.7E+05  | 6.6E+06  | 8.8E+06  | 1.3E+06  | 2.3E+06  | 1.0E+06  | 1.4E+06  | 3.4E+05  | 5.8E+05  | n.d.     | n.d.     | n.d.     | n.d.     | n.d.     | n.d.     | 3.7E+07 |
| A06 | Dihydrodiol       | 4.3      | C <sub>22</sub> H <sub>29</sub> N <sub>3</sub> O <sub>3</sub> | 384.2282           | n.d.     | n.d.     | 5.0E+04  | 9.3E+05  | 2.2E+05  | 1.1E+05  | 1.5E+05  | 1.2E+05  | 9.1E+04  | 4.8E+04  | 4.1E+04  | n.d.     | n.d.     | n.d.     | n.d.     | n.d.     | n.d.     | 1.5E+06 |
| A07 | (+2O, -2H)        | 4.5      | C <sub>22</sub> H <sub>25</sub> N <sub>3</sub> O <sub>3</sub> | 380.1969           | n.d.     | n.d.     | n.d.     | 8.4E+04  | 1.1E+05  | 5.2E+04  | 6.0E+04  | 4.2E+04  | 2.1E+04  | 1.7E+04  | n.d.     | n.d.     | n.d.     | n.d.     | n.d.     | n.d.     | n.d.     | 2.9E+06 |
| A08 | Monohydroxylation | 4.8      | C <sub>22</sub> H <sub>27</sub> N <sub>3</sub> O <sub>2</sub> | 366.2176           | n.d.     | n.d.     | 1.1E+06  | 1.7E+07  | 4.1E+06  | 1.4E+06  | 1.5E+06  | 7.7E+05  | 5.7E+05  | 4.5E+05  | 2.9E+05  | 2.6E+04  | 6.1E+04  | 2.7E+04  | 1.5E+04  | 1.3E+04  | 1.1E+04  | 7.3E+07 |
| A09 | Monohydroxylation | 5.2      | C <sub>22</sub> H <sub>27</sub> N <sub>3</sub> O <sub>2</sub> | 366.2176           | n.d.     | n.d.     | 3.8E+05  | 7.6E+06  | 2.5E+06  | 9.8E+05  | 9.1E+05  | 6.1E+05  | 4.4E+05  | 3.9E+05  | 2.9E+05  | 2.9E+04  | 4.2E+04  | 1.6E+04  | 1.2E+04  | n.d.     | n.d.     | 4.6E+07 |
| A10 | Monohydroxylation | 5.6      | C <sub>22</sub> H <sub>27</sub> N <sub>3</sub> O <sub>2</sub> | 366.2176           | n.d.     | n.d.     | 1.5E+05  | 2.9E+06  | 8.7E+05  | 3.4E+05  | 5.0E+05  | 3.6E+05  | 2.7E+05  | 2.0E+05  | 2.0E+05  | 2.1E+04  | 2.1E+04  | 7.0E+03  | 3.6E+03  | n.d.     | n.d.     | 1.1E+07 |

n.d.; Not detectable

The peak area of each metabolite was normalized to a creatinine value of 100 mg/dL

The time point of sampling is given in hours

Urine 00 was taken directly before oral drug intake

Urine samples 01 - 16 were taken after the self-administration

In vitro data after pHLM incubation of Cumyl-PINACA are given for comparison

**Table S4** NMR data of the unknown compound detected in four e-liquids (for numbering see Fig. S3)

| Carbon No.   | <sup>1</sup> H Δ (ppm) | Multiplicity | <i>J</i> (Hz) | <sup>13</sup> C Δ (ppm) |
|--------------|------------------------|--------------|---------------|-------------------------|
| 1            |                        |              |               | 161.8                   |
| 3'           |                        |              |               | 137.8                   |
| 3'a          |                        |              |               | 122.7                   |
| 4'           | 8.33 (1 H)             | td           | 8.38; 1.02    | 123.1                   |
| 5'           | 7.20-7.25 (1 H)        | m            |               | 122.4                   |
| 6'           | 7.38-7.40 (1 H)        | m            |               | 126.6                   |
| 7'           | 7.38-7.40 (1 H)        | m            |               | 108.9                   |
| 7a'          |                        |              |               | 140.8                   |
| 1''          | 4.41 (2 H)             | t            | 7.11          | 49                      |
| 2''          | 2.01 (2 H)             | quint.       | 7.35          | 29.3                    |
| 3''          | 1.44-1.54 (2 H)        | m            |               | 22.6                    |
| 4''          | 1.68-1.83 (2 H)        | m            |               | 29.9                    |
| 5''          | 4.45 (2 H)             | dt           | 5.88; 47.07   | 83.9 (d)                |
| 1'''         |                        |              |               | 55.8                    |
| 2'''         | 1.87 (6 H)             | s            |               | 29.5                    |
| 1''''        |                        |              |               | 147.3                   |
| 2''''+ 6'''' | 7.50-7.55 (2 H)        | m            |               | 124.7                   |
| 3''''+ 5'''' | 7.32-7.38 (2 H)        | m            |               | 128.3                   |
| 4''''        | 7.20-7.25 (1 H)        | m            |               | 126.5                   |

CDCl<sub>3</sub> was used as a solvent

**Table S5** In vivo phase I metabolites of 5F-Cumyl-PINACA detected in authentic urine samples in the order of their retention time (RT)

| <b>ID</b> | <b>Type</b>              | <b>RT<br/>[min]</b> | <b>Formula</b>                                                 | <b>[M+H]<sup>+</sup></b> | <b>pHLM<br/>[Peak area]</b> | <b>Urine<br/>[Peak area]</b> |
|-----------|--------------------------|---------------------|----------------------------------------------------------------|--------------------------|-----------------------------|------------------------------|
| B01       | Dihydrodiol              | 3.60                | C <sub>22</sub> H <sub>28</sub> FN <sub>3</sub> O <sub>3</sub> | 402.2187                 | 7.0E+06                     | 5.6E+04                      |
| B02       | <i>N</i> -Pentanoic acid | 4.50                | C <sub>22</sub> H <sub>25</sub> N <sub>3</sub> O <sub>3</sub>  | 380.1969                 | 9.3E+06                     | 1.8E+05                      |
| B03       | Monohydroxylation        | 4.70                | C <sub>22</sub> H <sub>26</sub> FN <sub>3</sub> O <sub>2</sub> | 384.2082                 | 6.1E+07                     | 3.9E+05                      |
| B04       | Defluorination           | 4.80                | C <sub>22</sub> H <sub>27</sub> N <sub>3</sub> O <sub>2</sub>  | 366.2176                 | 6.0E+07                     | 2.2E+05                      |
| B05       | Monohydroxylation        | 4.80                | C <sub>22</sub> H <sub>26</sub> FN <sub>3</sub> O <sub>2</sub> | 384.2082                 | 5.8E+07                     | 2.7E+05                      |
| B06       | Monohydroxylation        | 5.00                | C <sub>22</sub> H <sub>26</sub> FN <sub>3</sub> O <sub>2</sub> | 384.2082                 | 4.4E+07                     | 1.5E+05                      |

In vitro data after pHLM incubation of 5F-Cumyl-PINACA are given for comparison
